# Supplementary material for: UK stroke incidence, mortality and cardiovascular risk management 1999–2008: time-trend analysis from the General Practice Research Database
Source: PubMed Central journal article supplement — BMJ Open. 2011 Oct 12;1(2):e000269. doi: 10.1136/bmjopen-2011-000269 (PMC3211058; doi:10.1136/bmjopen-2011-000269), 2011-10-12
Supplement: bmjopen-2011-000269-s1.pdf [file bmjopen-2011-000269-s1.pdf]

## Appendix: Codes

### Stroke

| <b>Pegasus Code</b> | <b>Read Code</b> | <b>Read Term</b>                                             |
|---------------------|------------------|--------------------------------------------------------------|
| 1469                | G66..00          | Stroke and cerebrovascular accident unspecified              |
| 1298                | G66..11          | CVA unspecified                                              |
| 3149                | G64z.00          | Cerebral infarction NOS                                      |
| 5363                | G64..11          | CVA - cerebral artery occlusion                              |
| 6116                | G66..13          | CVA - Cerebrovascular accident unspecified                   |
| 6960                | G61..11          | CVA - cerebrovascular accid due to intracerebral haemorrhage |
| 569                 | G64..12          | Infarction - cerebral                                        |
| 7780                | G667.00          | Left sided CVA                                               |
| 12833               | G668.00          | Right sided CVA                                              |
| 6155                | G64..13          | Stroke due to cerebral arterial occlusion                    |
| 6253                | G66..12          | Stroke unspecified                                           |
| 18604               | G61..12          | Stroke due to intracerebral haemorrhage                      |
| 17322               | G664.00          | Cerebellar stroke syndrome                                   |
| 8443                | G663.00          | Brain stem stroke syndrome                                   |
| 9985                | G64z200          | Left sided cerebral infarction                               |
| 10504               | G64z300          | Right sided cerebral infarction                              |
| 36717               | G640000          | Cerebral infarction due to thrombosis of cerebral arteries   |
| 23671               | G63y000          | Cerebral infarct due to thrombosis of precerebral arteries   |
| 6228                | G68X.00          | Sequelae of stroke,not specfd as h'morrhage or infarction    |
| 24446               | G63y100          | Cerebral infarction due to embolism of precerebral arteries  |
| 39344               | G676000          | Cereb infarct due cerebral venous thrombosis, nonpyogenic    |
| 27975               | G641000          | Cerebral infarction due to embolism of cerebral arteries     |
| 53745               | Gyu6400          | [X]Other cerebral infarction                                 |
| 39403               | G683.00          | Sequelae of cerebral infarction                              |
| 47607               | L440.11          | CVA - cerebrovascular accident in the puerperium             |
| 65770               | G677200          | Occlusion and stenosis of posterior cerebral artery          |
| 51759               | G677000          | Occlusion and stenosis of middle cerebral artery             |
| 57527               | G677100          | Occlusion and stenosis of anterior cerebral artery           |

### Other CVD

Includes Coronary Heart Disease (CHD) and Peripheral Vascular Disease (PVD).

#### **CHD:**

| <b>Pegasus Code</b> | <b>Read Code</b> | <b>Read Term</b>                                     |
|---------------------|------------------|------------------------------------------------------|
| 241                 | G30..00          | Acute myocardial infarction                          |
| 14658               | G30z.00          | Acute myocardial infarction NOS                      |
| 1677                | G30..15          | MI - acute myocardial infarction                     |
| 10562               | G307100          | Acute non-ST segment elevation myocardial infarction |
| 5904                | 792..00          | Coronary artery operations                           |
| 1678                | G308.00          | Inferior myocardial infarction NOS                   |
| 1204                | G30..14          | Heart attack                                         |
| 12229               | G30X000          | Acute ST segment elevation myocardial infarction     |
| 2491                | G30..12          | Coronary thrombosis                                  |
| 14897               | G301z00          | Anterior myocardial infarction NOS                   |

|       |         |                                                              |
|-------|---------|--------------------------------------------------------------|
| 7442  | 7920200 | Saphenous vein graft replacement of three coronary arteries  |
| 5387  | G301.00 | Other specified anterior myocardial infarction               |
| 12139 | G300.00 | Acute anterolateral infarction                               |
| 8935  | G302.00 | Acute inferolateral infarction                               |
| 11610 | 7920300 | Saphenous vein graft replacement of four+ coronary arteries  |
| 17872 | G301100 | Acute anteroseptal infarction                                |
| 7634  | 7920100 | Saphenous vein graft replacement of two coronary arteries    |
| 9507  | G307000 | Acute non-Q wave infarction                                  |
| 10603 | 792z.00 | Coronary artery operations NOS                               |
| 23892 | G304.00 | Posterior myocardial infarction NOS                          |
| 7783  | 323..00 | ECG: myocardial infarction                                   |
| 16408 | G32..11 | Healed myocardial infarction                                 |
| 14898 | G305.00 | Lateral myocardial infarction NOS                            |
| 13571 | G30..16 | Thrombosis - coronary                                        |
| 29643 | G303.00 | Acute inferoposterior infarction                             |
| 17689 | G30..17 | Silent myocardial infarction                                 |
| 46017 | G30yz00 | Other acute myocardial infarction NOS                        |
| 18842 | G35..00 | Subsequent myocardial infarction                             |
| 13566 | G30..11 | Attack - heart                                               |
| 47788 | 7927    | Other open operations on coronary artery                     |
| 32272 | G38..00 | Postoperative myocardial infarction                          |
| 9555  | G33z500 | Post infarct angina                                          |
| 34803 | G30y.00 | Other acute myocardial infarction                            |
| 29758 | G30X.00 | Acute transmural myocardial infarction of unspecif site      |
| 41221 | G30y200 | Acute septal infarction                                      |
| 10209 | 7921200 | Autograft replacement of three coronary arteries NEC         |
| 23579 | G310.00 | Postmyocardial infarction syndrome                           |
| 42708 | 7921300 | Autograft replacement of four of more coronary arteries NEC  |
| 19413 | 7921100 | Autograft replacement of two coronary arteries NEC           |
| 38609 | G351.00 | Subsequent myocardial infarction of inferior wall            |
| 63467 | G306.00 | True posterior myocardial infarction                         |
| 32854 | G30B.00 | Acute posterolateral myocardial infarction                   |
| 41835 | G384.00 | Postoperative subendocardial myocardial infarction           |
| 45370 | 7922300 | Allograft replacement of four or more coronary arteries      |
| 45886 | 7922200 | Allograft replacement of three coronary arteries             |
| 31540 | 7924200 | Revision of bypass for three coronary arteries               |
| 26972 | 3234    | ECG:posterior/inferior infarct                               |
| 67761 | 7923300 | Prosthetic replacement of four or more coronary arteries     |
| 46276 | G381.00 | Postoperative transmural myocardial infarction inferior wall |
| 55092 | 792C000 | Replacement of coronary arteries using multiple methods      |
| 66236 | 7923200 | Prosthetic replacement of three coronary arteries            |
| 57241 | 7922100 | Allograft replacement of two coronary arteries               |
| 67554 | 7924100 | Revision of bypass for two coronary arteries                 |
| 68748 | G38z.00 | Postoperative myocardial infarction, unspecified             |
| 31519 | 7925100 | Double implant of mammary arteries into coronary arteries    |
| 46112 | G380.00 | Postoperative transmural myocardial infarction anterior wall |
| 46166 | G35X.00 | Subsequent myocardial infarction of unspecified site         |
| 62608 | 7926000 | Double anastom thoracic arteries to coronary arteries NEC    |
| 62626 | G30y100 | Acute papillary muscle infarction                            |
| 66664 | 7923100 | Prosthetic replacement of two coronary arteries              |

72562 G353.00 Subsequent myocardial infarction of other sites  
96838 Gyu3400 [X]Acute transmural myocardial infarction of unspecif site  
1430 G33..00 Angina pectoris  
19542 662K000 Angina control - good  
1431 G311.13 Unstable angina  
13185 662K.00 Angina control  
1344 G340.12 Coronary artery disease  
7347 G311100 Unstable angina  
8942 7929400 Insertion of coronary artery stent  
28554 G33zz00 Angina pectoris NOS  
7137 7920y00 Saphenous vein graft replacement of coronary artery OS  
1414 G33z300 Angina on effort  
4656 G311.11 Crescendo angina  
12804 G33z700 Stable angina  
25842 G33z.00 Angina pectoris NOS  
15373 662K100 Angina control - poor  
18118 G311400 Worsening angina  
17054 7N41300 [SO]Coronary artery  
18249 7920 Saphenous vein graft replacement of coronary artery  
14782 662K200 Angina control - improving  
15349 662Kz00 Angina control NOS  
17307 G311200 Angina at rest  
5096 AA1..00 Vincent's angina  
18889 G34z000 Asymptomatic coronary heart disease  
19655 G311.14 Angina at rest  
36854 G332.00 Coronary artery spasm  
12986 G331.00 Prinzmetal's angina  
22020 792B000 Endarterectomy of coronary artery NEC  
42304 7929500 Insertion of drug-eluting coronary artery stent  
8679 7920000 Saphenous vein graft replacement of one coronary artery  
17133 G30A.00 Mural thrombosis  
25481 P6y4.00 Coronary artery anomaly  
31413 J083300 Ludwig's angina  
51515 7920z00 Saphenous vein graft replacement coronary artery NOS  
9155 7N48000 [SO]Pulmonary artery  
9414 7921 Other autograft replacement of coronary artery  
24888 7929 Other therapeutic transluminal operations on coronary artery  
18125 G330000 Nocturnal angina  
3778 7A12311 Aorto biiliac graft  
26863 G33z600 New onset angina  
11048 G331.11 Variant angina pectoris  
30421 G30..13 Cardiac rupture following myocardial infarction (MI)  
34328 G311300 Refractory angina  
31571 792y.00 Other specified operations on coronary artery  
31195 7A0..00 Great vessels and pulmonary artery operations  
45740 7A09300 Open embolectomy of pulmonary artery  
37324 7A09000 Application of band to pulmonary artery  
45960 8B27.00 Antianginal therapy  
34965 792A.00 Diagnostic transluminal operations on coronary artery  
28736 G30y000 Acute atrial infarction

|       |         |                                                              |
|-------|---------|--------------------------------------------------------------|
| 40429 | G301000 | Acute anteroapical infarction                                |
| 19164 | 7927100 | Repair of aneurysm of coronary artery                        |
| 39449 | G312.00 | Coronary thrombosis not resulting in myocardial infarction   |
| 44561 | 7921000 | Autograft replacement of one coronary artery NEC             |
| 44585 | 792Bz00 | Repair of coronary artery NOS                                |
| 28104 | 7A06211 | Blalock anastomosis of subclavian artery to pulmonary artery |
| 38328 | 7A0A.00 | Transluminal operations on pulmonary artery                  |
| 53546 | P6y4z00 | Coronary artery anomaly NOS                                  |
| 31556 | 7922    | Allograft replacement of coronary artery                     |
| 32508 | P738.00 | Atresia of pulmonary artery with septal defect               |
| 45809 | G350.00 | Subsequent myocardial infarction of anterior wall            |
| 55137 | G311011 | MI - myocardial infarction aborted                           |
| 33620 | 792B.00 | Repair of coronary artery NEC                                |
| 48206 | 7927300 | Transposition of coronary artery NEC                         |
| 61072 | G311000 | Myocardial infarction aborted                                |
| 35472 | 7A09400 | Open embolisation of pulmonary artery                        |
| 36307 | P737.11 | Dilatation of pulmonary artery                               |
| 51043 | ZRBN.00 | Duke's coronary artery disease score                         |
| 72176 | AA1z.00 | Vincent's angina NOS                                         |
| 6182  | 7929y00 | Other therapeutic transluminal op on coronary artery OS      |
| 29902 | G330z00 | Angina decubitus NOS                                         |
| 32509 | 7A08.00 | Repair of pulmonary artery                                   |
| 43446 | 792A100 | Intravascular ultrasound of coronary artery                  |
| 52483 | 7A08100 | Repair of pulmonary artery using patch                       |
| 19402 | 7923    | Prosthetic replacement of coronary artery                    |
| 51702 | 7927400 | Exploration of coronary artery                               |
| 55569 | 7A0A200 | Arteriography of pulmonary artery                            |
| 62163 | P6y4100 | Single coronary artery                                       |
| 18903 | 7927000 | Repair of arteriovenous fistula of coronary artery           |
| 37037 | 7A07000 | Creation of anastomosis from vena cava to pulmonary artery   |
| 51112 | 7A0z.00 | Great vessel and pulmonary artery operations NOS             |
| 42127 | P73z.00 | Pulmonary artery anomaly NOS                                 |
| 51507 | 7925300 | Single anastomosis of mammary artery to coronary artery NEC  |
| 54487 | P734.00 | Hypoplasia of the pulmonary artery                           |
| 33718 | 7925000 | Double anastomosis of mammary arteries to coronary arteries  |
| 55598 | 792C.00 | Other replacement of coronary artery                         |
| 65029 | P737.00 | Pulmonary artery aneurysm                                    |
| 40017 | 7A06212 | Taussig anastomosis of subclavian artery to pulmonary artery |
| 41757 | 7927z00 | Other open operation on coronary artery NOS                  |
| 42524 | 7A08200 | Repair of anomalous pulmonary artery NEC                     |
| 59428 | 7A06200 | Creation anastomosis subclavian artery to pulmonary art NEC  |
| 65359 | 7A0A000 | Percutaneous transluminal embolisation of pulmonary artery   |
| 7609  | 7921z00 | Other autograft replacement of coronary artery NOS           |
| 18982 | P733.00 | Coarctation of the pulmonary artery                          |
| 31373 | P6y4400 | Anomalous coronary artery communication                      |
| 37719 | 7925y00 | Connection of mammary artery to coronary artery OS           |
| 48767 | 7922z00 | Allograft replacement of coronary artery NOS                 |
| 24176 | A340000 | Streptococcal angina                                         |
| 61248 | 792Az00 | Diagnostic transluminal operation on coronary artery NOS     |
| 63187 | P730.00 | Pulmonary artery anomaly, unspecified                        |

|       |         |                                                               |
|-------|---------|---------------------------------------------------------------|
| 66583 | 7929200 | Percut translum inject therap subst to coronary artery NEC    |
| 72797 | 7A09200 | Removal of band from pulmonary artery                         |
| 93433 | 7A0A700 | Percut transluminal insertion of stent into pulmonary artery  |
| 93618 | 7929600 | Percutaneous transluminal atherectomy of coronary artery      |
| 52411 | P73y.00 | Other specified anomaly of pulmonary artery                   |
| 56905 | 792Ay00 | Diagnostic transluminal operation on coronary artery OS       |
| 68139 | 7925400 | Single implantation of mammary artery into coronary artery    |
| 48697 | 7A65000 | Transposition of valve of vein                                |
| 61310 | 7921y00 | Other autograft replacement of coronary artery OS             |
| 69247 | 792By00 | Other specified repair of coronary artery                     |
| 70755 | 792Cz00 | Replacement of coronary artery NOS                            |
| 52615 | P6y7.00 | Myocardial bridge of coronary artery                          |
| 59659 | 7A0Ay00 | Other specified transluminal operation on pulmonary artery    |
| 62258 | 7A08z00 | Repair of pulmonary artery NOS                                |
| 65459 | 7A0A100 | Percutaneous transluminal embolectomy of pulmonary artery     |
| 34262 | 7A0Az00 | Transluminal operation on pulmonary artery NOS                |
| 56529 | 7A06.00 | Other connection from subclavian artery to pulmonary artery   |
| 59423 | 7922y00 | Other specified allograft replacement of coronary artery      |
| 60753 | 7926300 | Single implantation thoracic artery into coronary artery NEC  |
| 66801 | 7A0y.00 | Great vessel or pulmonary artery operations OS                |
| 67591 | 7926200 | Single anastomosis of thoracic artery to coronary artery NEC  |
| 68138 | 7A04.00 | Other connection from aorta to pulmonary artery               |
| 70111 | 7922000 | Allograft replacement of one coronary artery                  |
| 72604 | P500.00 | Absent septum between aorta and pulmonary artery              |
| 73489 | 7A06300 | Revision anastomosis subclavian artery to pulmonary artery    |
| 90119 | 7A07.00 | Other connection to pulmonary artery                          |
| 95391 | 7A09z00 | Other open operation on pulmonary artery NOS                  |
| 19193 | 7923z00 | Prosthetic replacement of coronary artery NOS                 |
| 39546 | Gyu3000 | [X]Other forms of angina pectoris                             |
| 61592 | 7927200 | Transection of muscle bridge of coronary artery               |
| 62255 | 7A07z00 | Other connection to pulmonary artery NOS                      |
| 67928 | P731.00 | Pulmonary artery agenesis                                     |
| 68551 | 7A08y00 | Other specified repair of pulmonary artery                    |
| 72780 | 7926z00 | Connection of other thoracic artery to coronary artery NOS    |
| 90852 | 7A06600 | Perc translum occlusion anast pulmonary artery subclavian art |
| 91479 | 7A09500 | Pulmonary artery ligation                                     |
| 92419 | 7923000 | Prosthetic replacement of one coronary artery                 |
| 93432 | 792B200 | Repair of arteriovenous malformation of coronary artery       |
| 93828 | 792Cy00 | Other specified replacement of coronary artery                |
| 94503 | 7A00400 | Repair anomalous pulmonary artery origin ascending aorta      |
| 94783 | 792B100 | Repair of rupture of coronary artery                          |
| 95382 | 7927y00 | Other specified other open operation on coronary artery       |
| 96047 | 7A07y00 | Other specified other connection to pulmonary artery          |
| 96661 | 7A09.00 | Other open operations on pulmonary artery                     |
| 96804 | 7926    | Connection of other thoracic artery to coronary artery        |

**Peripheral vascular disease:**

| <b>Pegasus Code</b> | <b>Read Code</b> | <b>Read Term</b>                                             |
|---------------------|------------------|--------------------------------------------------------------|
| 2760                | G73zz00          | Peripheral vascular disease NOS                              |
| 3530                | G73z.00          | Peripheral vascular disease NOS                              |
| 5943                | G73..00          | Other peripheral vascular disease                            |
| 4325                | G73yz00          | Other specified peripheral vascular disease NOS              |
| 6356                | 7A4B000          | Percutaneous transluminal angioplasty of femoral artery      |
| 2066                | 7A48z00          | Other bypass of femoral artery or popliteal artery NOS       |
| 10827               | 7A44000          | Percutaneous transluminal angioplasty of iliac artery        |
| 18060               | 7A48.14          | Other bypass of femoral artery                               |
| 2761                | 7A12100          | Bypass bifurc aorta by anastom aorta to femoral artery NEC   |
| 24692               | 7A48.00          | Other bypass of femoral artery or popliteal artery           |
| 29112               | 7A4B100          | Percutaneous transluminal angioplasty of popliteal artery    |
| 12331               | 7A48.15          | Other bypass of popliteal artery                             |
| 8610                | G76z000          | Iliac artery occlusion                                       |
| 27580               | 7A48000          | Bypass femoral artery by fem/pop art anast c prosthesis NEC  |
| 28030               | 7A48200          | Bypass femoral artery by fem/pop art anast c vein graft NEC  |
| 27494               | G74y300          | Embolism and thrombosis of the iliac artery unspecified      |
| 15532               | 7A12300          | Bypass bifurcation aorta by anastom aorta to iliac artery    |
| 21927               | 7A41.00          | Other bypass of iliac artery                                 |
| 11766               | 7A47.16          | Other emergency bypass of femoral artery                     |
| 42640               | 7A48y00          | Other bypass of femoral artery or popliteal artery OS        |
| 31723               | 7A28000          | Percutaneous transluminal angioplasty of subclavian artery   |
| 28616               | 7A41100          | Bypass iliac artery by iliac/femoral artery anastomosis NEC  |
| 38907               | G73y.00          | Other specified peripheral vascular disease                  |
| 39776               | 7A47.14          | Other emergency bypass of popliteal artery                   |
| 41823               | 7A48600          | Bypass femoral artery by fem/tib art anast c vein graft NEC  |
| 9099                | 7A47.00          | Other emergency bypass of femoral artery or popliteal artery |
| 45428               | 7A48C00          | Bypass femoral artery by femoral/femoral art anastomosis NEC |
| 29183               | 7A26000          | Bypass of subclavian artery NEC                              |
| 42115               | 7A48D00          | Bypass popliteal artery by pop/fem artery anastomosis NEC    |
| 24097               | 7A48300          | Bypass popliteal artery by pop/pop a anast c vein graft NEC  |
| 37465               | 7A28100          | Percutaneous transluminal angioplasty of brachial artery     |
| 36443               | 7A41300          | Bypass iliac artery by femoral/femoral art anastomosis NEC   |
| 39877               | 7A48400          | Bypass femoral artery by fem/tib art anast c prosthesis NEC  |
| 37546               | 7A26700          | Bypass of brachial artery NEC                                |
| 48700               | 7A48700          | Bypass popliteal artery by pop/tib a anast c vein graft NEC  |
| 52357               | 7A41y00          | Other specified other bypass of iliac artery                 |
| 58191               | 7A26100          | Bypass of axillary artery NEC                                |
| 37787               | 7A48.12          | Other bypass of common femoral artery                        |
| 38921               | 7A41z00          | Other bypass of iliac artery NOS                             |
| 40732               | 7A48.16          | Other bypass of superficial femoral artery                   |
| 60370               | 7A28C00          | Percutaneous transluminal angioplasty of axillary artery     |
| 61974               | 7A48.11          | Other bypass of femoral or popliteal artery by anastomosis   |
| 60465               | 7A48500          | Bypass popliteal artery by pop/tib a anast c prosthesis NEC  |
| 32492               | 7A41900          | Bypass common iliac artery by aorta/com iliac art anast NEC  |
| 55554               | 7A41B00          | Bypass leg artery by aorta/com femoral art anastomosis NEC   |
| 65692               | 7A47y00          | Other emergency bypass of femoral or popliteal artery OS     |
| 68320               | 7A47z00          | Other emergency bypass of femoral or popliteal artery NOS    |

48939 7A47C00 Emerg bypass femoral artery by fem/fem art anastomosis NEC  
 66804 7A41C00 Bypass leg artery by aorta/deep femoral art anastomosis NEC  
 70922 7A47D00 Emerg bypass popliteal artery by pop/fem art anastomosis NEC  
 72448 7A41200 Emerg bypass iliac artery by femoral/femoral art anast NEC  
 48755 7A12000 Emerg bypass bifurc aorta by anast aorta to femoral artery  
 63238 7A47.13 Other emergency bypass of deep femoral artery  
 64555 7A48100 Bypass popliteal artery by pop/pop a anast c prosthesis NEC  
 66917 7A41600 Emerg bypass leg artery by aorta/com fem art anastomosis NEC  
 67982 7A48800 Bypass femoral artery by fem/peron a anast c prosthesis NEC  
 97606 7A47.15 Other emergency bypass of superficial femoral artery  
     733 7A54000 Percutaneous transluminal angioplasty of artery NEC  
     5640 G70..00 Atherosclerosis  
     1318 G700.00 Aortic atherosclerosis  
 30296 7A1A000 Percutaneous transluminal balloon angioplasty of aorta  
 53675 7A48A00 Bypass femoral artery by fem/peron a anast c vein graft NEC  
 56429 P76z.00 Peripheral vascular system anomaly NOS  
 44528 SP12z00 Peripheral vascular complications of care NOS  
 66921 7A6H400 Percutaneous transluminal angioplasty of vascular graft  
 95430 7A56200 Percutaneous transluminal occlusion of artery  
 73961 Gyu7400 [X]Other specified peripheral vascular diseases  
     1517 G73z000 Intermittent claudication  
     6853 G73z011 Claudication  
     7975 16l..00 Claudication distance  
     1826 G73..12 Ischaemia of legs

### **Atrial Fibrillation**

| Pegasus Code | Read Code | Read Term                                                    |
|--------------|-----------|--------------------------------------------------------------|
| 18357        | 3274      | ECG: paroxysmal atrial tachy.                                |
| 9023         | G576300   | Atrial premature depolarization                              |
| 43860        | 7936900   | Implantation of intravenous atrial overdrive pacemaker       |
| 1757         | G573100   | Atrial flutter                                               |
| 93460        | 14AR.00   | History of atrial flutter                                    |
| 84152        | 793M100   | Perc transluminal ablation of atrial wall for atrial flutter |
| 6771         | 3273      | ECG: atrial flutter                                          |
| 1664         | G573000   | Atrial fibrillation                                          |
| 2212         | G573.00   | Atrial fibrillation and flutter                              |
| 1268         | G573200   | Paroxysmal atrial fibrillation                               |
| 18746        | 662S.00   | Atrial fibrillation monitoring                               |
| 6345         | 14AN.00   | H/O: atrial fibrillation                                     |
| 3757         | 3272      | ECG: atrial fibrillation                                     |
| 1297         | G570000   | Paroxysmal atrial tachycardia                                |
| 57832        | 9Os..00   | Atrial fibrillation monitoring administration                |
| 45773        | 6A9..00   | Atrial fibrillation annual review                            |
| 39114        | 9hF1.00   | Excepted from atrial fibrillation qual indic: Inform dissent |
| 23437        | G573z00   | Atrial fibrillation and flutter NOS                          |

|       |         |                                                             |
|-------|---------|-------------------------------------------------------------|
| 90187 | 9Os0.00 | Atrial fibrillation monitoring first letter                 |
| 63350 | 9hF..00 | Exception reporting: atrial fibrillation quality indicators |
| 96076 | G573500 | Persistent atrial fibrillation                              |
| 9479  | 7936A00 | Implant intravenous pacemaker for atrial fibrillation       |
| 90188 | 9Os1.00 | Atrial fibrillation monitoring second letter                |
| 35127 | G573300 | Non-rheumatic atrial fibrillation                           |
| 90189 | 9Os2.00 | Atrial fibrillation monitoring third letter                 |
| 96277 | G573400 | Permanent atrial fibrillation                               |
| 90190 | 9Os3.00 | Atrial fibrillation monitoring verbal invite                |
| 90191 | 9Os4.00 | Atrial fibrillation monitoring telephone invite             |

### Hypertension

| Pegasus Code | Read Code | Read Term                                             |
|--------------|-----------|-------------------------------------------------------|
| 799          | G20..00   | Essential hypertension                                |
| 4444         | 662..12   | Hypertension monitoring                               |
| 204          | G2...00   | Hypertensive disease                                  |
| 13186        | 662P.00   | Hypertension monitoring                               |
| 351          | G20..11   | High blood pressure                                   |
| 10818        | G20z.00   | Essential hypertension NOS                            |
| 19070        | 662d.00   | Hypertension annual review                            |
| 4344         | 9N03.00   | Seen in hypertension clinic                           |
| 3712         | G20z.11   | Hypertension NOS                                      |
| 5215         | 9OI..00   | Hypertension monitoring admin.                        |
| 18482        | 662c.00   | Hypertension six month review                         |
| 11056        | 8BL0.00   | Patient on maximal tolerated antihypertensive therapy |
| 3425         | 662O.00   | On treatment for hypertension                         |
| 16565        | 6627      | Good hypertension control                             |
| 1611         | F450400   | Ocular hypertension                                   |
| 45149        | 9OI1.00   | Attends hypertension monitor.                         |
| 36305        | 9OIA.00   | Hypertension monitor.chck done                        |
| 7057         | G2z..00   | Hypertensive disease NOS                              |
| 27511        | 6628      | Poor hypertension control                             |
| 13188        | 662G.00   | Hypertensive treatm.changed                           |
| 1894         | G201.00   | Benign essential hypertension                         |
| 8732         | G2...11   | BP - hypertensive disease                             |
| 4372         | G202.00   | Systolic hypertension                                 |
| 27634        | 9N1y200   | Seen in hypertension clinic                           |
| 27525        | 9OI..11   | Hypertension clinic admin.                            |
| 18057        | 8B26.00   | Antihypertensive therapy                              |



|       |         |                                                 |
|-------|---------|-------------------------------------------------|
| 245   | G410.00 | Primary pulmonary hypertension                  |
| 21826 | 662F.00 | Hypertension treatm. started                    |
| 24127 | 90IA.11 | Hypertension monitored                          |
| 6702  | F421300 | Hypertensive retinopathy                        |
| 5433  | F282.00 | Benign intracranial hypertension                |
| 16292 | G21..00 | Hypertensive heart disease                      |
| 15377 | G200.00 | Malignant essential hypertension                |
| 18590 | 662b.00 | Moderate hypertension control                   |
| 5129  | J623.00 | Portal hypertension                             |
| 22356 | 1JD..00 | Suspected hypertension                          |
| 5513  | 8HT5.00 | Referral to hypertension clinic                 |
| 7329  | G24..00 | Secondary hypertension                          |
| 12680 | 8CR4.00 | Hypertension clinical management plan           |
| 4668  | G22..00 | Hypertensive renal disease                      |
| 8857  | G21z011 | Cardiomegaly - hypertensive                     |
| 30776 | 6629    | Hypertension:follow-up default                  |
| 34065 | G41y000 | Secondary pulmonary hypertension                |
| 29310 | G22z.11 | Renal hypertension                              |
| 16059 | G24z.00 | Secondary hypertension NOS                      |
| 18765 | G2y..00 | Other specified hypertensive disease            |
| 16173 | G21zz00 | Hypertensive heart disease NOS                  |
| 3979  | G672.00 | Hypertensive encephalopathy                     |
| 21660 | TJC7.00 | Adverse reaction to other antihypertensives     |
| 31341 | G24z100 | Hypertension secondary to drug                  |
| 20497 | TJC7z00 | Adverse reaction to antihypertensives NOS       |
| 22333 | 8I3N.00 | Hypertension treatment refused                  |
| 26347 | G8y3.00 | Chronic peripheral venous hypertension          |
| 32976 | 6146200 | Hypertension induced by oral contraceptive pill |
| 15106 | G22z.00 | Hypertensive renal disease NOS                  |
| 43220 | 90I2.00 | Refuses hypertension monitor.                   |
| 83473 | G203.00 | Diastolic hypertension                          |
| 31387 | G24z000 | Secondary renovascular hypertension NOS         |
| 55603 | 7Q01000 | Primary pulmonary hypertension drugs band 1     |
| 42229 | G24zz00 | Secondary hypertension NOS                      |
| 39649 | G220.00 | Malignant hypertensive renal disease            |
| 31816 | G672.11 | Hypertensive crisis                             |
| 34744 | G244.00 | Hypertension secondary to endocrine disorders   |
| 25371 | G241000 | Secondary benign renovascular hypertension      |
| 31464 | G21z.00 | Hypertensive heart disease NOS                  |
| 32423 | G222.00 | Hypertensive renal disease with renal failure   |
| 57288 | G241.00 | Secondary benign hypertension                   |

|       |         |                                                             |
|-------|---------|-------------------------------------------------------------|
| 28684 | G233.00 | Hypertensive heart and renal disease with renal failure     |
| 51635 | G241z00 | Secondary benign hypertension NOS                           |
| 31755 | G240.00 | Secondary malignant hypertension                            |
| 37086 | F404200 | Blind hypertensive eye                                      |
| 30770 | U60C511 | [X] Adverse reaction to other antihypertensives             |
| 21837 | G232.00 | Hypertensive heart&renal dis wth (congestive) heart failure |
| 43935 | G221.00 | Benign hypertensive renal disease                           |
| 69753 | Gyu2.00 | [X]Hypertensive diseases                                    |
| 52427 | G211.00 | Benign hypertensive heart disease                           |
| 61166 | G21z000 | Hypertensive heart disease NOS without CCF                  |
| 63466 | G23..00 | Hypertensive heart and renal disease                        |
| 62718 | G21z100 | Hypertensive heart disease NOS with CCF                     |
| 50157 | G210.00 | Malignant hypertensive heart disease                        |
| 44350 | U60C51A | [X] Adverse reaction to antihypertensives NOS               |
| 63946 | 7Q01100 | Primary pulmonary hypertension drugs band 2                 |
| 52127 | G211100 | Benign hypertensive heart disease with CCF                  |
| 59383 | G240000 | Secondary malignant renovascular hypertension               |
| 68659 | G23z.00 | Hypertensive heart and renal disease NOS                    |
| 90875 | 7Q01300 | Primary pulmonary hypertension drugs band 4                 |
| 61660 | G211000 | Benign hypertensive heart disease without CCF               |
| 73293 | G240z00 | Secondary malignant hypertension NOS                        |
| 65081 | 7Q01200 | Primary pulmonary hypertension drugs band 3                 |
| 67232 | G230.00 | Malignant hypertensive heart and renal disease              |
| 85944 | 7Q01.00 | High cost hypertension drugs                                |
| 63000 | G231.00 | Benign hypertensive heart and renal disease                 |
| 63260 | SLC6z00 | Hypertensive agent poisoning NOS                            |
| 95334 | G210000 | Malignant hypertensive heart disease without CCF            |
| 72226 | SLC6.00 | Other hypertensive agent poisoning                          |
| 72668 | G210100 | Malignant hypertensive heart disease with CCF               |
| 97533 | Gyu2100 | [X]Hypertension secondary to other renal disorders          |

### **Hypercholesterolaemia**

| Pegasus Code | Read Code    | Read Term                      |
|--------------|--------------|--------------------------------|
|              | 339 C320.00  | Pure hypercholesterolaemia     |
|              | 637 C324.00  | Hyperlipidaemia NOS            |
|              | 2493 44P3.00 | Serum cholesterol raised       |
|              | 5791 C322.00 | Mixed hyperlipidaemia          |
|              | 856 44O6.00  | Lipids abnormal                |
|              | 7447 C320z00 | Pure hypercholesterolaemia NOS |
|              | 3386 C320000 | Familial hypercholesterolaemia |

|       |         |                                                          |
|-------|---------|----------------------------------------------------------|
| 12569 | ZV65317 | [V]Dietary surveillance in hypercholesterolaemia         |
| 34224 | C320300 | Low-density-lipoprotein-type (LDL) hyperlipoproteinaemia |
| 26941 | 44Q3.00 | Serum triglycerides raised                               |
| 26019 | C320200 | Hyperlipidaemia, group A                                 |
| 14781 | 44O4.00 | Serum lipids high                                        |
| 37273 | C320400 | Fredrickson's hyperlipoproteinaemia, type IIa            |
| 43484 | 687B.00 | Hyperlipidaemia risk assessment with New Zealand table   |
| 35720 | 44P4.00 | Serum cholesterol very high                              |
| 3484  | C320.11 | Familial hypercholesterolaemia                           |
| 59095 | C320.13 | Low density lipoproteinaemia                             |
| 33694 | ZC2CJ00 | Dietary advice for hyperlipidaemia                       |
| 16290 | C325300 | A-beta-lipoproteinaemia                                  |
| 53091 | C320y00 | Other specified pure hypercholesterolaemia               |
| 23125 | 44O3.00 | Serum lipids borderline raised                           |
| 66240 | Cyu8D00 | [X]Other hyperlipidaemia                                 |
| 34825 | C320100 | Hyperbetalipoproteinaemia                                |
| 71747 | 8CR3.00 | Hyperlipidaemia clinical management plan                 |
| 70793 | C325200 | Hypo-beta-lipoproteinaemia                               |
| 34146 | C325100 | Hypo-alpha-lipoproteinaemia                              |

## **Diabetes Mellitus**

| Pegasus Code | Read Code | Read Term                                                    |
|--------------|-----------|--------------------------------------------------------------|
| 1549         | C10E.00   | Type 1 diabetes mellitus                                     |
| 8842         | 66A5.00   | Diabetic on insulin                                          |
| 1038         | C100011   | Insulin dependent diabetes mellitus                          |
| 1647         | C108.00   | Insulin dependent diabetes mellitus                          |
| 17858        | C108.12   | Type 1 diabetes mellitus                                     |
| 10692        | C10EM00   | Type 1 diabetes mellitus with ketoacidosis                   |
| 24423        | C108.13   | Type I diabetes mellitus                                     |
| 24490        | C100000   | Diabetes mellitus, juvenile type, no mention of complication |
| 10418        | C10ED00   | Type 1 diabetes mellitus with nephropathy                    |
| 16946        | 13L4.11   | Diabetic child                                               |
| 30323        | C10EK00   | Type 1 diabetes mellitus with persistent proteinuria         |
| 30294        | C10EL00   | Type 1 diabetes mellitus with persistent microalbuminuria    |
| 50960        | L180500   | Pre-existing diabetes mellitus, insulin-dependent            |
| 18387        | C10E700   | Type 1 diabetes mellitus with retinopathy                    |
| 6509         | C108700   | Insulin dependent diabetes mellitus with retinopathy         |
| 44443        | C108500   | Insulin dependent diabetes mellitus with ulcer               |
| 6791         | C108800   | Insulin dependant diabetes mellitus - poor control           |
| 51261        | C10E.12   | Insulin dependent diabetes mellitus                          |

|       |         |                                                              |
|-------|---------|--------------------------------------------------------------|
| 32359 | ZRbH.00 | Perceived control of insulin-dependent diabetes              |
| 35288 | C10E800 | Type 1 diabetes mellitus - poor control                      |
| 40837 | C10EN00 | Type 1 diabetes mellitus with ketoacidotic coma              |
| 46624 | C10C.11 | Maturity onset diabetes in youth                             |
| 26855 | C108400 | Unstable insulin dependant diabetes mellitus                 |
| 53200 | C101000 | Diabetes mellitus, juvenile type, with ketoacidosis          |
| 39070 | C10EE00 | Type 1 diabetes mellitus with hypoglycaemic coma             |
| 12455 | C10E.11 | Type I diabetes mellitus                                     |
| 55239 | C10EQ00 | Type 1 diabetes mellitus with gastroparesis                  |
| 44440 | C108E00 | Insulin dependent diabetes mellitus with hypoglycaemic coma  |
| 22871 | C10EP00 | Type 1 diabetes mellitus with exudative maculopathy          |
| 18683 | C10E500 | Type 1 diabetes mellitus with ulcer                          |
| 54008 | C10EJ00 | Type 1 diabetes mellitus with neuropathic arthropathy        |
| 46963 | C108000 | Insulin-dependent diabetes mellitus with renal complications |
| 43921 | C10E400 | Unstable type 1 diabetes mellitus                            |
| 47582 | C10E000 | Type 1 diabetes mellitus with renal complications            |
| 93380 | C10N100 | Cystic fibrosis related diabetes mellitus                    |
| 40682 | C10E900 | Type 1 diabetes mellitus maturity onset                      |
| 42729 | C108E11 | Type I diabetes mellitus with hypoglycaemic coma             |
| 42831 | C10E200 | Type 1 diabetes mellitus with neurological complications     |
| 46301 | C10EC00 | Type 1 diabetes mellitus with polyneuropathy                 |
| 47650 | C10E300 | Type 1 diabetes mellitus with multiple complications         |
| 57621 | C108D00 | Insulin dependent diabetes mellitus with nephropathy         |
| 38161 | C108711 | Type I diabetes mellitus with retinopathy                    |
| 41716 | C108C00 | Insulin dependent diabetes mellitus with polyneuropathy      |
| 49276 | C108100 | Insulin-dependent diabetes mellitus with ophthalmic comps    |
| 49554 | C10EF00 | Type 1 diabetes mellitus with diabetic cataract              |
| 51957 | C108511 | Type I diabetes mellitus with ulcer                          |
| 41049 | C108712 | Type 1 diabetes mellitus with retinopathy                    |
| 67853 | C106000 | Diabetes mellitus, juvenile, + neurological manifestation    |
| 44260 | C108F00 | Insulin dependent diabetes mellitus with diabetic cataract   |
| 47649 | C10E100 | Type 1 diabetes mellitus with ophthalmic complications       |
| 52283 | C108200 | Insulin-dependent diabetes mellitus with neurological comps  |
| 56448 | C108A00 | Insulin-dependent diabetes without complication              |
| 60499 | C108600 | Insulin dependent diabetes mellitus with gangrene            |
| 62209 | C10EM11 | Type I diabetes mellitus with ketoacidosis                   |
| 69676 | C10EA00 | Type 1 diabetes mellitus without complication                |

|       |         |                                                              |
|-------|---------|--------------------------------------------------------------|
| 18642 | C10EH00 | Type 1 diabetes mellitus with arthropathy                    |
| 45276 | C10E312 | Insulin dependent diabetes mellitus with multiple complicat  |
| 21983 | C108012 | Type 1 diabetes mellitus with renal complications            |
| 40023 | C102000 | Diabetes mellitus, juvenile type, with hyperosmolar coma     |
| 42567 | C103000 | Diabetes mellitus, juvenile type, with ketoacidotic coma     |
| 69993 | C10E600 | Type 1 diabetes mellitus with gangrene                       |
| 49949 | C10E411 | Unstable type I diabetes mellitus                            |
| 68792 | C10z000 | Diabetes mellitus, juvenile type, + unspecified complication |
| 72345 | C102z00 | Diabetes mellitus NOS with hyperosmolar coma                 |
| 96235 | C10E911 | Type I diabetes mellitus maturity onset                      |
| 17545 | C108F11 | Type I diabetes mellitus with diabetic cataract              |
| 18230 | C108J12 | Type 1 diabetes mellitus with neuropathic arthropathy        |
| 52104 | C108300 | Insulin dependent diabetes mellitus with multiple complicatn |
| 54600 | C10E412 | Unstable insulin dependent diabetes mellitus                 |
| 60208 | C108J11 | Type I diabetes mellitus with neuropathic arthropathy        |
| 61344 | C108011 | Type I diabetes mellitus with renal complications            |
| 66872 | C108D11 | Type I diabetes mellitus with nephropathy                    |
| 69748 | C105000 | Diabetes mellitus, juvenile type, + ophthalmic manifestation |
| 45914 | C108812 | Type 1 diabetes mellitus - poor control                      |
| 49146 | C108211 | Type I diabetes mellitus with neurological complications     |
| 60107 | C108411 | Unstable type I diabetes mellitus                            |
| 61829 | C108212 | Type 1 diabetes mellitus with neurological complications     |
| 65616 | C108H00 | Insulin dependent diabetes mellitus with arthropathy         |
| 68105 | C10EB00 | Type 1 diabetes mellitus with mononeuropathy                 |
| 68390 | C108512 | Type 1 diabetes mellitus with ulcer                          |
| 70448 | C107000 | Diabetes mellitus, juvenile +peripheral circulatory disorder |
| 70766 | C108E12 | Type 1 diabetes mellitus with hypoglycaemic coma             |
| 93875 | C10E712 | Insulin dependent diabetes mellitus with retinopathy         |
| 93878 | C10E511 | Type I diabetes mellitus with ulcer                          |
| 95343 | C10E711 | Type I diabetes mellitus with retinopathy                    |
| 24694 | C108B00 | Insulin dependent diabetes mellitus with mononeuropathy      |
| 62352 | C108H11 | Type I diabetes mellitus with arthropathy                    |
| 62613 | C10EA11 | Type I diabetes mellitus without complication                |
| 63017 | C108911 | Type I diabetes mellitus maturity onset                      |
| 66145 | C10EN11 | Type I diabetes mellitus with ketoacidotic coma              |
| 72702 | C10E812 | Insulin dependent diabetes mellitus - poor control           |
| 91942 | C10E311 | Type I diabetes mellitus with multiple complications         |

|       |         |                                                            |
|-------|---------|------------------------------------------------------------|
| 91943 | C10EC11 | Type I diabetes mellitus with polyneuropathy               |
| 93468 | C10EG00 | Type 1 diabetes mellitus with peripheral angiopathy        |
| 93922 | C104000 | Diabetes mellitus, juvenile type, with renal manifestation |
| 95992 | C108A11 | Type I diabetes mellitus without complication              |

## Death

| Pegasus Code | Read Code     | Read Term                                 |
|--------------|---------------|-------------------------------------------|
|              | 7847 22J..12  | Death                                     |
|              | 13549 94...00 | Death administration                      |
|              | 1127 22J..13  | Died                                      |
|              | 1448 22J..14  | Patient died                              |
|              | 1868 8HG..00  | Died in hospital                          |
|              | 9059 8HG..11  | Death in hospital                         |
|              | 8706 94B..00  | Cause of death                            |
|              | 18447 9234    | FP22-death                                |
|              | 6897 9495     | Patient died in hospital                  |
|              | 6855 9491     | Patient died at home                      |
|              | 6811 R21..00  | [D]Sudden death, cause unknown            |
|              | 6576 22J..00  | O/E - dead                                |
|              | 6991 9493     | Patient died in nursing home              |
|              | 13551 941..00 | Death certificate form Med A              |
|              | 28801 9451    | Death notif. from hospital                |
|              | 13555 949..12 | Deceased - place patient died             |
|              | 13553 94Z..00 | Death administration NOS                  |
|              | 18169 ZV68011 | [V]Issue of death certificate             |
|              | 23075 22J4.00 | O/E - dead - sudden death                 |
|              | 28378 949A.00 | Patient died in hospice                   |
|              | 27505 949Z.00 | Patient died in place NOS                 |
|              | 23073 9412    | Death cert. Med A signed                  |
|              | 15337 R213.00 | [D]Unattended death                       |
|              | 20540 949..00 | Patient died - to record place            |
|              | 17680 94A..00 | Unexpected death-Coroner told             |
|              | 15858 949..13 | Died - place patient died                 |
|              | 33249 94D..00 | Hospital notified of death                |
|              | 7962 R213100  | [D]Found dead                             |
|              | 26812 9494    | Patient died in resid.inst.NOS            |
|              | 51482 9452    | Await hosp death disch letter             |
|              | 46304 9134.12 | Registration ghost - died                 |
|              | 31121 R212000 | [D]Death, not instantaneous cause unknown |
|              | 28645 9453    | Receiv hosp death disch letter            |

|       |         |                                                        |
|-------|---------|--------------------------------------------------------|
| 39580 | 946..00 | Death notif. - non.hosp source                         |
| 43009 | 94E..00 | Date of death                                          |
| 15986 | R211.00 | [D]Instantaneous death                                 |
| 23077 | 22J2.00 | O/E - dead - expected                                  |
| 19628 | 949..11 | Dead - place patient died                              |
| 21195 | G575100 | Sudden cardiac death, so described                     |
| 39311 | 9492    | Patient died in part 3 accom.                          |
| 28879 | 945..00 | Hospital death discharge notif                         |
| 30357 | 949B.00 | Patient died in community hospital                     |
| 23074 | 94...11 | Administration after pat. died                         |
| 35520 | 22J1.00 | O/E - dead - unexpected                                |
| 30327 | 9498    | Dead on arrival at hospital                            |
| 58563 | 94F..00 | Unexpected death                                       |
| 30333 | 9496    | Patient died in street                                 |
| 28687 | 9497    | Patient died in publ.place NOS                         |
| 23830 | R21z.00 | [D]Sudden death, cause unknown NOS                     |
| 13550 | 947Z.00 | SD17/18 cause of death NOS                             |
| 46108 | 22JZ.00 | O/E - dead NOS                                         |
| 30400 | 9499    | Found dead at accident site                            |
| 28927 | 945Z.00 | Hospital death disch. NOS                              |
| 48438 | 941Z.00 | Death cert. Med A NOS                                  |
| 48491 | 236..12 | O/E - respiratory death                                |
| 46606 | 9134.11 | Registration ghost - dead                              |
| 46349 | 22J6.00 | O/E - dead - suspicious death                          |
| 32129 | R213000 | [D]Found after death, unknown cause of death           |
| 66033 | 941..11 | Certificate - death                                    |
| 61220 | R212.00 | [D]Death less than 24 hours from onset of illness      |
| 40882 | 94B..11 | Condition fatal-cause of death                         |
| 30500 | 22J3.00 | O/E - dead - unattended death                          |
| 94234 | R212100 | [D]Died, with no sign of disease                       |
| 50388 | 9411    | Death cert. Med A due                                  |
| 56106 | R213z00 | [D]Unattended death NOS                                |
| 66176 | 22J..11 | O/E - dead - condition fatal                           |
| 46616 | T0y0.00 | Found dead on railway right-of-way unspecified         |
| 48986 | 947..00 | Cause of death clarif. SD17/18                         |
| 49947 | 7L1M000 | Preoperative anaesthetic death                         |
| 67519 | 949C.00 | Patient died in GP surgery                             |
| 66966 | T0y0200 | Found dead on railway unspecified - pedestrian         |
| 68167 | T0y0z00 | Found dead on railway unspecified - unspecified person |
| 71596 | 9471    | SD17/18 received-death clarif.                         |

|       |         |                                                          |
|-------|---------|----------------------------------------------------------|
| 73130 | RyuC100 | [X]Other sudden death, cause unknown                     |
| 73170 | 947..11 | SD17 - cause of death clarif                             |
| 93203 | R212z00 | [D]Death less than 24 hours from onset of illness<br>NOS |
