# Supplementary material for: UK stroke incidence, mortality and cardiovascular risk management 1999–2008: time-trend analysis from the General Practice Research Database
Source: PubMed Central journal article supplement — BMJ Open. 2011 Oct 12;1(2):e000269. doi: 10.1136/bmjopen-2011-000269 (PMC3211058; doi:10.1136/bmjopen-2011-000269), 2011-10-12
Supplement: bmjopen-2011-000269-s2.pdf [file bmjopen-2011-000269-s2.pdf]

# STROBE checklist for EARTH study

Cohort Study  
Checklist

|                              | Item No | Recommendation                                                                                                                                                                       | Page Number | Section                               | Additional Information                                                                                                                                                                                          |
|------------------------------|---------|--------------------------------------------------------------------------------------------------------------------------------------------------------------------------------------|-------------|---------------------------------------|-----------------------------------------------------------------------------------------------------------------------------------------------------------------------------------------------------------------|
| <b>Title and abstract</b>    |         |                                                                                                                                                                                      |             |                                       |                                                                                                                                                                                                                 |
|                              | 1       | (a) Indicate the study's design with a commonly used term in the title or the abstract                                                                                               | 2           | Abstract                              |                                                                                                                                                                                                                 |
|                              |         | (b) Provide in the abstract an informative and balanced summary of what was done and what was found                                                                                  | 2           | Abstract                              |                                                                                                                                                                                                                 |
| <b>Introduction</b>          |         |                                                                                                                                                                                      |             |                                       |                                                                                                                                                                                                                 |
| Background/<br>rationale     | 2       | Explain the scientific background and rationale for the investigation being reported                                                                                                 | 3           | Introduction                          |                                                                                                                                                                                                                 |
| Objectives                   | 3       | State specific objectives, including any prespecified hypotheses                                                                                                                     | 3           | Objectives                            |                                                                                                                                                                                                                 |
| <b>Methods</b>               |         |                                                                                                                                                                                      |             |                                       |                                                                                                                                                                                                                 |
| Study design                 | 4       | Present key elements of study design early in the paper                                                                                                                              | 3           | Methods-<br>Study Design              |                                                                                                                                                                                                                 |
| Setting                      | 5       | Describe the setting, locations, and relevant dates, including periods of recruitment, exposure, follow-up, and data collection                                                      | 3           | Methods-<br>Data Source               |                                                                                                                                                                                                                 |
| Participants                 | 6       | (a) Give the eligibility criteria, and the sources and methods of selection of participants. Describe methods of follow-up                                                           | 4           | Methods-<br>Population &<br>Follow Up |                                                                                                                                                                                                                 |
|                              |         | (b) For matched studies, give matching criteria and number of exposed and unexposed                                                                                                  | NA          |                                       |                                                                                                                                                                                                                 |
| Variables                    | 7       | Clearly define all outcomes, exposures, predictors, potential confounders, and effect modifiers. Give diagnostic criteria, if applicable                                             | 4           | Methods-<br>Population &<br>Analysis  |                                                                                                                                                                                                                 |
| Data sources/<br>measurement | 8*      | For each variable of interest, give sources of data and details of methods of assessment (measurement). Describe comparability of assessment methods if there is more than one group | 3           | Methods-<br>Data Source               |                                                                                                                                                                                                                 |
| Bias                         | 9       | Describe any efforts to address potential sources of bias                                                                                                                            | 9           | Limitations                           |                                                                                                                                                                                                                 |
| Study size                   | 10      | Explain how the study size was arrived at                                                                                                                                            |             |                                       | This is a descriptive study, and no comparative analysis is being carried out, and therefore a sample size calculation is not appropriate. Our cohort of over 32,000 patients is very large, and allows precise |
|                              |         |                                                                                                                                                                                      | NA          |                                       |                                                                                                                                                                                                                 |

estimates of population variables, as shown in the paper by the narrow 99% confidence intervals.

|                        |    |                                                                                                                              |       |                   |                                                                                                                                                                                                                                                                                                                                        |
|------------------------|----|------------------------------------------------------------------------------------------------------------------------------|-------|-------------------|----------------------------------------------------------------------------------------------------------------------------------------------------------------------------------------------------------------------------------------------------------------------------------------------------------------------------------------|
| Quantitative variables | 11 | Explain how quantitative variables were handled in the analyses. If applicable, describe which groupings were chosen and why | 4     | Methods-Analysis  |                                                                                                                                                                                                                                                                                                                                        |
| Statistical methods    | 12 | (a) Describe all statistical methods, including those used to control for confounding                                        | 4     | Methods-Analysis  |                                                                                                                                                                                                                                                                                                                                        |
|                        |    | (b) Describe any methods used to examine subgroups and interactions                                                          | 4 & 5 | Methods-Follow Up |                                                                                                                                                                                                                                                                                                                                        |
|                        |    | (c) Explain how missing data were addressed                                                                                  | 4     | Methods-Analysis  |                                                                                                                                                                                                                                                                                                                                        |
|                        |    | (d) If applicable, explain how loss to follow-up was addressed                                                               |       |                   |                                                                                                                                                                                                                                                                                                                                        |
|                        |    | (e) Describe any sensitivity analyses                                                                                        | 4     | Methods-Analysis  |                                                                                                                                                                                                                                                                                                                                        |
|                        |    |                                                                                                                              | NA    |                   | This is a GPRD study so the only type of missing data is values which are not recorded for every patients, such as body mass index. This is addressed in the Methods section. Further missing data is unlikely due to the nature of a GP database, All patients are followed up until death or until they transferred out of practice. |

**Results**

|                  |     |                                                                                                                                                                                                    |   |                          |  |
|------------------|-----|----------------------------------------------------------------------------------------------------------------------------------------------------------------------------------------------------|---|--------------------------|--|
| Participants     | 13* | (a) Report numbers of individuals at each stage of study? eg numbers potentially eligible, examined for eligibility, confirmed eligible, included in the study, completing follow-up, and analysed | 5 | Baseline characteristics |  |
|                  |     | (b) Give reasons for non-participation at each stage                                                                                                                                               | 5 | Baseline characteristics |  |
|                  |     | (c) Consider use of a flow diagram                                                                                                                                                                 | - | -                        |  |
| Descriptive data | 14* | (a) Give characteristics of study participants (eg demographic, clinical, social) and information on exposures and potential confounders                                                           | 5 | Results- Table 1         |  |
|                  |     | (b) Indicate number of participants with missing data for each variable of interest                                                                                                                | 5 | Results- Table 1         |  |

|                          |     |                                                                                                                                                                                                                                                                                                                                                                                                               |                  |                                                                     |
|--------------------------|-----|---------------------------------------------------------------------------------------------------------------------------------------------------------------------------------------------------------------------------------------------------------------------------------------------------------------------------------------------------------------------------------------------------------------|------------------|---------------------------------------------------------------------|
|                          |     | (c) Summarise follow-up time (eg average and total amount)                                                                                                                                                                                                                                                                                                                                                    |                  | Results-<br>Baseline characteristics                                |
| Outcome data             | 15* | Report numbers of outcome events or summary measures over time                                                                                                                                                                                                                                                                                                                                                | 5                | Results-<br>Stroke mortality and<br>Recurrent cardiovascular events |
| Main results             | 16  | (a) Give unadjusted estimates and, if applicable, confounder-adjusted estimates and their precision (eg, 95% confidence interval). Make clear which confounders were adjusted for and why they were included<br>(b) Report category boundaries when continuous variables were categorized<br>(c) If relevant, consider translating estimates of relative risk into absolute risk for a meaningful time period | 6<br>5 & 6<br>NA | Results<br>NA                                                       |
| Other analyses           | 17  | Report other analyses done? eg analyses of subgroups and interactions, and sensitivity analyses                                                                                                                                                                                                                                                                                                               | NA<br>6 & 7      | NA<br>Results- Atrial fibrillation                                  |
| <b>Discussion</b>        |     |                                                                                                                                                                                                                                                                                                                                                                                                               |                  |                                                                     |
| Key results              | 18  | Summarise key results with reference to study objectives                                                                                                                                                                                                                                                                                                                                                      | 7                | Discussion                                                          |
| Limitations              | 19  | Discuss limitations of the study, taking into account sources of potential bias or imprecision. Discuss both direction and magnitude of any potential bias                                                                                                                                                                                                                                                    | 8                | Discussion-<br>limitations                                          |
| Interpretation           | 20  | Give a cautious overall interpretation of results considering objectives, limitations, multiplicity of analyses, results from similar studies, and other relevant evidence                                                                                                                                                                                                                                    | 7 & 8 &<br>9     | Discussion &<br>Implications                                        |
| Generalisability         | 21  | Discuss the generalisability (external validity) of the study results                                                                                                                                                                                                                                                                                                                                         | 7                | Discussion                                                          |
| <b>Other information</b> |     |                                                                                                                                                                                                                                                                                                                                                                                                               |                  |                                                                     |
| Funding                  | 22  | Give the source of funding and the role of the funders for the present study and, if applicable, for the original study on which the present article is based                                                                                                                                                                                                                                                 | 10               | Funding                                                             |
