# Supplementary material for: UK stroke incidence, mortality and cardiovascular risk management 1999–2008: time-trend analysis from the General Practice Research Database
Source: PubMed Central journal article supplement — BMJ Open. 2011 Oct 12;1(2):e000269. doi: 10.1136/bmjopen-2011-000269 (PMC3211058; doi:10.1136/bmjopen-2011-000269), 2011-10-12
Supplement: bmjopen-2011-000269.draft_revisions.pdf [file bmjopen-2011-000269.draft_revisions.pdf]

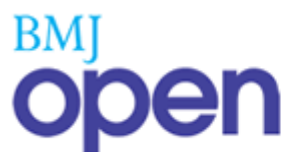

**UK stroke incidence, mortality and cardiovascular risk management 1999-2008: time-trend analysis from the General Practice Research Database**

|                                 |                                                                                                                                                                |
|---------------------------------|----------------------------------------------------------------------------------------------------------------------------------------------------------------|
| Journal:                        | <i>BMJ Open</i>                                                                                                                                                |
| Manuscript ID:                  | bmjopen-2011-000269                                                                                                                                            |
| Article Type:                   | Research                                                                                                                                                       |
| Date Submitted by the Author:   | 21-Jul-2011                                                                                                                                                    |
| Complete List of Authors:       | Lee, Sally; Boehringer Ingelheim, MAPOR<br>Shafe, Anna; Boehringer Ingelheim, MAPOR<br>Cowie, Martin; Imperial College London, National Heart & Lung Institute |
| <b>Primary Subject Heading</b>: | Cardiovascular medicine                                                                                                                                        |
| Keywords:                       | CARDIOLOGY, STROKE MEDICINE, EPIDEMIOLOGY                                                                                                                      |
|                                 |                                                                                                                                                                |

SCHOLARONE™  
Manuscripts

only

1  
2  
3 **UK stroke incidence, mortality and cardiovascular risk**  
4  
5  
6 **management 1999-2008: time-trend analysis from the General**  
7  
8  
9 **Practice Research Database**  
10

11  
12  
13  
14 Sally Lee, PhD,<sup>1</sup> Anna Shafe, MSc,<sup>1</sup> Martin R Cowie, MD<sup>2§</sup>  
15  
16

17  
18  
19 <sup>1</sup> Boehringer Ingelheim Ltd, Ellesfield Avenue, Bracknell, Berkshire RG12 8YS, UK  
20

21 <sup>2</sup> National Heart & Lung Institute, Imperial College London, Dovehouse Street  
22

23  
24 London SW3 6LY, UK  
25  
26

27  
28 §Corresponding author  
29  
30

31  
32  
33 Email addresses and telephone numbers:  
34

35 SL: [sally.lee@boehringer-ingelheim.com](mailto:sally.lee@boehringer-ingelheim.com) +44 (1344) 74-6997  
36

37 AS: [anna.shafe@boehringer-ingelheim.com](mailto:anna.shafe@boehringer-ingelheim.com) +44 (1344) 74-1488  
38

39 MRC: [m.cowie@imperial.ac.uk](mailto:m.cowie@imperial.ac.uk) +44 (207) 351 8856  
40  
41  
42  
43  
44  
45

46 Keywords: Stroke, Cardiovascular diseases, General Practice, Atrial Fibrillation  
47

48 Word Count: 2,605 (excluding title page, abstract, references, figures and tables)  
49

50 The Corresponding Author has the right to grant on behalf of all authors and does  
51 grant on behalf of all authors, a worldwide licence to the Publishers and its licensees  
52 in perpetuity, in all forms, formats and media (whether known now or created in the  
53 future), to i) publish, reproduce, distribute, display and store the Contribution, ii)  
54 translate the Contribution into other languages, create adaptations, reprints, include  
55 within collections and create summaries, extracts and/or, abstracts of the  
56 Contribution, iii) create any other derivative work(s) based on the Contribution, iv) to  
57 exploit all subsidiary rights in the Contribution, v) the inclusion of electronic links  
58 from the Contribution to third party material where-ever it may be located; and, vi)  
59 licence any third party to do any or all of the above.  
60

## Abstract

### Objectives

Stroke is a major cause of morbidity and mortality. This study aimed to investigate secular trends in stroke across the UK.

### Design

This study aimed to investigate recent trends in the epidemiology of stroke in the UK. The study was a time-trend analysis from 1999 to 2008 within the UK General Practice Research Database. Outcome measures were incidence and prevalence of stroke, stroke mortality, rate of secondary cardiovascular events, and prescribing of pharmacological therapy for primary and secondary prevention of cardiovascular disease.

### Results

The study cohort included 32 151 patients with a first stroke. Stroke incidence fell by 30%, from 1.48/1000 person-years in 1999 to 1.04/1000 person-years in 2008 ( $P<0.001$ ). Stroke prevalence increased by 12.5%, from 6.40/1000 in 1999 to 7.20/1000 in 2008 ( $P<0.001$ ). Fifty-six-day mortality after first stroke reduced from 21% in 1999 to 12% in 2008 ( $P<0.0001$ ). Prescribing of drugs to control cardiovascular risk factors increased consistently over the study period, particularly for lipid lowering agents and antihypertensive agents. In patients with atrial fibrillation, use of anticoagulants prior to first stroke did not increase with increasing stroke risk.

## Conclusion

Stroke incidence in the UK has decreased and survival after stroke has improved in the past 10 years. Improved drug treatment in primary care is likely to be a major contributor to this, with better control of risk factors both before and after incident stroke. There is however scope for further improvement in risk factor reduction in high-risk patients with atrial fibrillation.

### ARTICLE FOCUS

Regional UK data have suggested a decline in stroke incidence, in association with increased use of preventive treatments and reduction in cardiovascular risk factors

This is the first national study to examine recent trends in stroke incidence and mortality

### KEY MESSAGES

In the UK, stroke incidence and stroke mortality fell consistently between 1999 and 2008

This change coincided with marked increase in primary care prescription of primary and secondary cardiovascular prevention therapies

Despite these positive findings, there appears to be a need for better risk stratification. The data suggest underutilisation of anticoagulation in patients with atrial fibrillation at high risk of stroke. There is also evidence of lower use of all preventive treatments in women than in men.

### STRENGTHS AND LIMITATIONS

The General Practice Research Database (GPRD) is the largest primary care database in the world, containing the longitudinal records of over 3 million patients.

We are reliant on the quality of GP coding in the GPRD dataset. There may be some coding error and misreporting of cardiovascular events and risk factors.

The GPRD contains secondary care data but this is limited to diagnoses; data on secondary care prescribing is not available.

## BACKGROUND

Stroke is a major cause of morbidity and mortality in the United Kingdom. Around 110 000 strokes occur in England each year,<sup>1</sup> with recent studies reporting an incidence of between 1.36/1000/year<sup>2</sup> and 1.62/1000/year in 2002-4.<sup>3</sup> A study in the Scottish Borders reported a higher crude incidence rate of 2.8/1000/year, which was attributed to the higher proportion of elderly in the population.<sup>4</sup> Although deaths from stroke have fallen in the UK over the past 40 years,<sup>5-7</sup> stroke accounted for around 46 500 deaths in England and Wales in 2008 (9% of all deaths).<sup>8</sup>

Current UK health policy places great emphasis on reducing stroke.<sup>9-11</sup> Key to this is the need for better management of vascular risk factors, including hypertension, obesity, high cholesterol, atrial fibrillation and diabetes.<sup>6,11</sup> In 2008, NHS Health Check (formerly called the Vascular Check Programme) was introduced to identify and manage vascular risk.<sup>12</sup> More recently, NHS Improvement has identified atrial fibrillation in primary care as a priority area for the health service for 2010/11.<sup>13</sup> From a public health perspective it is important to know whether national policies and preventive strategies are having an effect on stroke epidemiology. Perhaps the best data on trends in stroke comes from the Oxfordshire region where data from two studies — the Oxford Community Stroke Project (1981-4) and the Oxford Vascular Study (2002-4) — were compared.<sup>3</sup> The results suggested a decline in incidence of stroke ( $P=0.0002$ ), in association with increased use of preventive treatments and reduction in risk factors.

1  
2  
3  
4  
5  
6  
7  
8  
9  
10  
11  
12  
13  
14  
15  
16  
17  
18  
19  
20  
21  
22  
23  
24  
25  
26  
27  
28  
29  
30  
31  
32  
33  
34  
35  
36  
37  
38  
39  
40  
41  
42  
43  
44  
45  
46  
47  
48  
49  
50  
51  
52  
53  
54  
55  
56  
57  
58  
59  
60

There has been no study looking at trends in stroke across the UK. We report an analysis of the General Practice Research Database (GPRD), used to investigate trends in the burden of stroke between 1999 and 2008.

## DESIGN

### Objectives

The objectives of this study were 1) to investigate recent trends in the epidemiology of stroke in the UK, including risk factors associated with first and second strokes, and pharmacological therapies prescribed before and following first stroke, and 2) to examine the trend in stroke fatality and the occurrence of second stroke following survival of a first stroke.

### Data source

The GPRD is a database of longitudinal patient primary care records, containing anonymised data on demographics, diagnoses, referrals, prescribing and health outcomes for patients from almost 500 GP practices in the UK (over 3 million patients). The database contains approximately 6% of UK patients, and the geographical distribution is representative of the UK population.<sup>16</sup> Validation studies have confirmed the high data quality and completeness of clinical records within the GPRD.<sup>15-17</sup> A recent systematic literature review of studies using the GPRD reported that the median proportion of diagnoses correctly coded was 89%.<sup>17</sup>

### Population

1  
2  
3 We identified patients aged 18 years and older who had a first stroke between 1999  
4 and 2008. Stroke events were identified by a diagnosis for stroke within the patient  
5 record. The Read codes used by GPs to enter a stroke into a patient record do not  
6 necessarily specify the type of stroke, so we were not able to distinguish between  
7 ischaemic and haemorrhagic strokes. The codes used are shown in Additional  
8 Material 1.  
9  
10  
11  
12  
13  
14  
15  
16

17  
18  
19 We excluded patients if they had any coded cardiovascular disease event (including  
20 coronary heart disease or peripheral vascular disease) recorded prior to stroke, except  
21 patients with a record of transient ischaemic attack (TIA).  
22  
23  
24  
25  
26  
27  
28

### 29 **Analysis**

30  
31 Data were extracted using GPRD GOLD online version and analysed using SAS®  
32 Software version 9.02. Incidence and prevalence of stroke were calculated based on  
33 our stroke cohort and the total study population extracted from GPRD.  
34  
35  
36  
37  
38  
39

40  
41 Co-morbidities were identified using 'Read' codes (Additional Material 1). In  
42 addition to coded diagnosis, a blood pressure result above 160/100mm Hg was  
43 defined as hypertension and a cholesterol level above 5mmol/L (193mg/dL) was  
44 defined as hypercholesterolemia. Pharmacological therapies prescribed in the year  
45 before the first stroke were recorded. We assumed that patients were treated with a  
46 medication if they received at least two prescriptions for that medication in the year  
47 prior to first stroke.  
48  
49  
50  
51  
52  
53  
54  
55  
56  
57  
58  
59  
60

1  
2  
3 For follow-up, patient data were available from the time of first stroke until the end of  
4  
5 the study period or when the patient transferred out of the practice or died. Stroke  
6  
7 events were considered fatal if patients had a death coded in their GP record within 56  
8  
9 days of the stroke. This timescale was used to allow for any delay between the death  
10  
11 occurring and the GP receiving notification of the death and entering it into their  
12  
13 coding system.  
14  
15

16  
17  
18  
19  
20 Second cardiovascular disease events were defined as a second stroke or other  
21  
22 cardiovascular disease event (coronary heart disease or peripheral vascular disease  
23  
24 event) occurring more than 56 days after a first stroke. A life table survival analysis  
25  
26 was carried out, with an event defined as either a second cardiovascular event or  
27  
28 death. Patients were censored if they transferred out of the practice or reached the end  
29  
30 of the study period.  
31  
32

33  
34  
35  
36 We examined trends in the proportion of patients treated with different classes of  
37  
38 pharmacological agents in the year before and after first stroke between 1999 and  
39  
40 2008. For patients with GP-coded atrial fibrillation (AF) prior to first stroke, we  
41  
42 calculated CHADS<sub>2</sub> scores<sup>9</sup> and recorded use of anticoagulants and antiplatelet drugs  
43  
44 for patients by CHADS<sub>2</sub> score in the year prior to and after first stroke.  
45  
46  
47  
48

## 49 RESULTS

50  
51  
52  
53 Between 1999 and 2008 first strokes were recorded in 32 151 patients with no  
54  
55 previous recorded cardiovascular event. Over this period, stroke incidence fell by  
56  
57 30%, from 1.48/1000 person-years in 1999 to 1.04/1000 person-years in 2008  
58  
59 (P<0.001). In patients aged 80 years and over (the group at highest risk) incidence fell  
60



1  
2  
3 by 42% from 18.97 to 10.97/1000 person-years ( $P < 0.001$ ). Prevalence of stroke  
4  
5 increased by 12.5% over the same period from 6.4/1000 persons to 7.2/1000 persons  
6  
7  
8 ( $P < 0.001$ ) (Figure 1).  
9

10  
11  
12 Table 1 shows baseline characteristics of the cohort. The average age at first stroke  
13  
14 was 77 years in women and 71 years in men. The most commonly coded stroke risk  
15  
16 factor was hypertension, recorded in 65% of patients. Twelve per cent of patients  
17  
18 were coded as diabetic, and 11% had coded AF.  
19  
20  
21

22  
23  
24 Fifteen per cent (4926/32 151) of first strokes were fatal (death coded within 56 days).  
25  
26 Mortality was 18.6% (3301 of 17 792) in women, and 11.3% (1625 of 14 359) in  
27  
28 men. Age-adjusted to the 2008 UK population<sup>10</sup> the mortality difference was smaller  
29  
30 but remained higher in women (6.8%) than men (5.5%) ( $P < 0.001$  for difference  
31  
32 between genders). Crude mortality after incident stroke decreased from 21% in 1999  
33  
34 to 12% in 2008 ( $P < 0.0001$ ). This trend was seen in both men and women (Figure 2).  
35  
36  
37  
38  
39

40  
41 Five-year survival was 82% (11 774/14 359) in men and 81% (14 411/17 792) in  
42  
43 women. Life table survival analysis showed that survival free of a second  
44  
45 cardiovascular event (recurrent stroke or first CHD event) at five years was 74% (23  
46  
47 766/32 151) and similar in men and women. After first stroke, patients were at high  
48  
49 risk of a recurrent event. Of patients followed up for five years, 24% (3316 of 13599)  
50  
51 had a second cardiovascular event; 75% of second events (2475) were strokes and  
52  
53 16% of these (385) were fatal within 56 days.  
54  
55  
56  
57  
58  
59

## 60 **Stroke Risk Factors and Management**

1  
2  
3 Sixty-five per cent of patients (n=20 959) had hypertension. Of these, 67% were  
4 treated with antihypertensives in the year prior to stroke: 69% of female and 64% of  
5  
6  
7  
8 male patients.  
9

10  
11  
12 Prescription of treatment for cardiovascular risk reduction in the year prior to a first  
13 stroke increased over time (Figure 3A). A similar trend was seen in prescriptions after  
14  
15  
16 the first stroke (Figure 3B). By 2008, 96.6% of women and 97.4% of men with coded  
17  
18  
19 hypertension in the year after stroke were receiving antihypertensive therapy.  
20  
21

22  
23  
24 Before first stroke, 38.7% of patients (n=12 440) had hypercholesterolemia; 8.7%  
25  
26  
27 were treated with lipid lowering drugs in 1999, rising to 37.6% in 2008. Prescriptions  
28  
29  
30 for lipid lowering drugs after a first stroke also increased rapidly over the last 10 years  
31  
32 (Figure 3).  
33

34  
35  
36 Eleven per cent of patients (n=3483) had coded AF before their first stroke: 10% of  
37  
38  
39 male patients and 12% of female patients (Table 1). These patients were older than  
40  
41  
42 the general stroke cohort. The average age in the AF group at the time of first stroke  
43  
44  
45 was 82 years for women and 77 years for men. Stroke mortality was higher in patients  
46  
47  
48 with coded AF than for the overall cohort: 27% of women and 19% of men with AF  
49  
50  
51 died within 56 days of their first stroke. For those over the age of 70 years, 56-day  
52  
53  
54 mortality after first stroke was 32% in men with coded AF compared with 23% in  
55  
56  
57 men without coded AF (p<0.001), and 36% in women with coded AF compared with  
58  
59  
60 28% in women without coded AF (p<0.001).

1  
2  
3 Women were at higher risk, with 59% having a CHADS<sub>2</sub> score of 2 or above prior to  
4 first stroke compared with 42% of men. When we excluded age from the CHADS<sub>2</sub>  
5  
6 calculation, women still scored higher than men: 67% of women and 59% of men had  
7  
8 a score of 1 or above, and 18% of women and 16% of men had a score of 2 or above.  
9  
10  
11

12  
13  
14  
15 Of patients with coded AF, 25% (876) were prescribed anticoagulants before their  
16  
17 stroke: 22% of women and 29% of men. Anticoagulant prescribing did not increase  
18  
19 with increasing CHADS<sub>2</sub> score prior to stroke (Figure 4). Antiplatelet therapy was  
20  
21 prescribed to 52% of patients with coded AF (1796/3483) (54% of women and 47%  
22  
23 of men) and prescribing increased steeply with increasing CHADS<sub>2</sub> score.  
24  
25  
26  
27

28  
29 For patients with coded AF at time of first stroke, anticoagulant prescribing increased  
30  
31 from 22% prior to stroke to 35% after stroke for women, and from 29% to 48% for  
32  
33 men (Table 2). In patients aged 80 and older, anticoagulant prescribing increased from  
34  
35 18% to 23% in women and from 24% to 34% in men.  
36  
37  
38  
39  
40

## 41 **CONCLUSION**

### 42 **Summary of main findings**

43  
44  
45 Our study shows that the incidence of stroke in the UK fell by 29% between 1999 and  
46  
47 2008. The 56-day mortality after a first stroke fell by 43% between 1999 and 2008.  
48  
49

50  
51 Primary care management of cardiovascular risk has improved, with the majority of  
52  
53 recorded hypertension being controlled prior to stroke, and a rapid increase in  
54  
55 prescriptions for lipid lowering drugs to patients with diagnosed  
56  
57 hypercholesterolemia. However there is a clear suggestion that risk stratification is not  
58  
59 yet optimal, particularly in relation to patients with AF.  
60

## Comparison with existing literature

A fall in stroke incidence similar to that shown in our study has previously been reported in Oxfordshire<sup>3</sup> and South London.<sup>18</sup> Our findings are also in line with data from some other high-income countries, with Feigin reporting a 42% decrease in age-adjusted stroke incidence rates over four decades to 2008.<sup>19</sup>

The observed reduction in stroke incidence is likely to be related to better control of vascular risk factors both prior to and following a stroke. By the end of the study period, GPs were treating cardiovascular risk factors much more aggressively than in 1999. A previous study<sup>3</sup> reported a trend to reduced incidence of stroke in association with increased use of preventive treatments and reduction in risk factors. Our data show improvement compared with a previous analysis of GPRD data (1997-2006) in which only 75% of patients with diagnosed hypertension were receiving antihypertensive therapy 90 days after incident stroke.<sup>20</sup> In our study, 97% of patients with hypertension after stroke were receiving antihypertensive therapy.

Improved primary care management of risk factors presumably reflects national initiatives to reduce cardiovascular disease. These include the Quality and Outcomes Framework whereby GPs in England are incentivised to improve intervention on cardiovascular risk factors. The increased level of prescribing seen in our study is in line with national increase in use of statins<sup>21</sup> and improved treatment of hypertension.<sup>22</sup>

1  
2  
3 AF is an important risk factor for stroke but recent reports have highlighted that it is  
4 both under-recognised and under-treated.<sup>21,23</sup> Our study confirms that such individuals  
5 have a higher mortality risk after first stroke than patients in sinus rhythm.  
6  
7  
8  
9

10  
11  
12 The CHADS<sub>2</sub> scoring system<sup>24</sup> is commonly used to assess stroke risk in patients with  
13 AF and help guide thromboprophylaxis. In our study, anticoagulant prescribing before  
14 stroke in patients with AF increased only slightly between 1999 and 2008. Use of  
15 anticoagulants appeared to be unrelated to the patient's CHADS<sub>2</sub> score, as has been  
16 reported previously.<sup>25</sup> There was a relatively high, and possibly inappropriate, level of  
17 anticoagulant prescribing in lower risk patients (those with a CHADS<sub>2</sub> score of 0) and  
18 no increase in use of anticoagulants with increasing stroke risk. The finding of high  
19 use of anticoagulants in AF patients at low risk of stroke has been reported previously  
20 in primary care in the UK.<sup>25</sup>  
21  
22  
23  
24  
25  
26  
27  
28  
29  
30  
31  
32  
33

34  
35  
36 Contrary to data from a previous study using GPRD,<sup>25</sup> we found that antiplatelet  
37 prescribing increased significantly with increasing CHADS<sub>2</sub> score, indicating that  
38 GPs might be responding to increasing thromboembolic risk by prescribing an  
39 antiplatelet agent rather than an anticoagulant. Use of anticoagulants was lower in  
40 women than men despite women's higher CHADS<sub>2</sub> scores. Women were older than  
41 men in the AF patient population and lower use of anticoagulants might reflect  
42 prescriber concerns that anticoagulants are more dangerous in the elderly. However,  
43 there has been shown to be no significant difference in bleeding risk between warfarin  
44 and aspirin in patients aged over 75 years.<sup>26</sup> The lower use of anticoagulants in  
45 women might also reflect findings from other areas of cardiovascular disease that  
46 women are treated less aggressively with drug therapy than men.<sup>27,28</sup>  
47  
48  
49  
50  
51  
52  
53  
54  
55  
56  
57  
58  
59  
60

## Limitations of study

We are reliant on the quality of GP coding in the GPRD dataset. There may be some coding error and misreporting of cardiovascular events and risk factors. The GPRD has quality criteria for practices involved in the data collection and we used data only from such “up-to-standard” practices. A recent systematic review of the validity of diagnostic coding within GPRD reported high positive predictive values (>80%) for events such as myocardial infarction or stroke, but a lower value for AF (64.4%).<sup>16</sup>

Despite an observed difference in risk factors between men and women in our cohort, we are not able to evaluate gender difference in the risk of secondary stroke, due to the potential confounding factor of age; female patients were older than male patients.

As the objectives of this study were purely descriptive we did not make any adjustment for confounding factors. Further studies are needed to examine gender differences in stroke risk and prevention.

## Implications for clinical practice

This is the first UK-wide study to investigate recent trends in stroke and it shows encouraging reduction in incidence of first stroke and improving survival. This is likely to be due (at least partially) to much better identification of vascular risk and prescription of preventive therapies prior to, and after, stroke. Despite these positive findings there are some areas where management appears to remain suboptimal.

Women are less well treated than men, perhaps due to an age bias. Patients with AF, who do particularly poorly after stroke, do not appear to be appropriately risk

1  
2  
3 stratified for anticoagulation therapy. Improved detection of AF and  
4  
5  
6 thromboprophylaxis in such patients should be a priority for healthcare systems.  
7  
8  
9  
10  
11  
12  
13  
14  
15  
16  
17  
18  
19  
20  
21  
22  
23  
24  
25  
26  
27  
28  
29  
30  
31  
32  
33  
34  
35  
36  
37  
38  
39  
40  
41  
42  
43  
44  
45  
46  
47  
48  
49  
50  
51  
52  
53  
54  
55  
56  
57  
58  
59  
60

For peer review only

## Contributors

AS and SL performed the data extraction and data analyses, and helped write the manuscript. MC advised regarding the study design and data analyses, and wrote the manuscript. He is the guarantor for the study.

## Funding

The study was funded by Boehringer Ingelheim Ltd.

## Ethical Approval

The protocol for the study has been approved by the Independent Scientific Advisory Committee at the Medicines and Healthcare products Regulatory Agency.

## Competing interests

MRC provides consultancy advice to a number of pharmaceutical companies, including Boehringer Ingelheim. He holds no stocks or shares in any such company.

SL and AS are employees of Boehringer Ingelheim Ltd.

## Data Sharing Statement

No additional data available.



## References

1. **National Audit Office. Progress in improving stroke care. 2004.**  
[www.nao.org.uk/publications/0910/stroke.aspx]
2. Hippisley-Cox, J, Pringle M, Ryan R: **Stroke: prevalence, incidence and care in general practices 2002 to 2004.** Final report to the National Stroke Audit Team. Royal College of Physicians, London; 2004.
3. Rothwell PM, Coull AJ, Giles MF, Howard SC, Silver LE, Bull LM et al: **Change in stroke incidence, mortality, case-fatality, severity, and risk factors in Oxfordshire, UK from 1981 to 2004 (Oxford Vascular Study).** *Lancet* 2004; **363**:1925-33.
4. Syme PD, Byrne AW, Chen R, Devenny R, Forbes JF: **Community-based stroke incidence in a Scottish population. The Scottish Borders Stroke Study.** *Stroke* 2005; **36**:1837-43.
5. Lawlor DA, Davey Smith G, Leon DA, Sterne JAC, Ebrahim S: **Secular trends in mortality by stroke subtype in the 20th century: a retrospective analysis.** *Lancet* 2002; **370**:1818-23.
6. **National Audit Office. Reducing brain damage: Faster access to better stroke care. 2005.**  
[www.nao.org.uk/publications/0506/reducing\_brain\_damage.aspx]
7. Ashton C, Bajekal M, Raine R: **Quantifying the contribution of leading causes of death to mortality decline among older people in England, 1991–2005.** *Health Stat Quart* Spring 2010; **45**:100-27.  
[www.statistics.gov.uk/hsq/hsqissue]

- 1  
2  
3  
4  
5  
6  
7  
8  
9  
10  
11  
12  
13  
14  
15  
16  
17  
18  
19  
20  
21  
22  
23  
24  
25  
26  
27  
28  
29  
30  
31  
32  
33  
34  
35  
36  
37  
38  
39  
40  
41  
42  
43  
44  
45  
46  
47  
48  
49  
50  
51  
52  
53  
54  
55  
56  
57  
58  
59  
60
8. **Office for National Statistics. Mortality statistics: Deaths registered in 2008.**  
[[http://www.statistics.gov.uk/downloads/theme\\_health/DR2008/DR\\_08.pdf](http://www.statistics.gov.uk/downloads/theme_health/DR2008/DR_08.pdf)]
  9. **Department of Health. Saving lives: Our healthier nation. London: Stationery Office, 1999.**  
[[www.dh.gov.uk/en/Publicationsandstatistics/Publications/PublicationsPolicyAndGuidance/DH\\_4118614](http://www.dh.gov.uk/en/Publicationsandstatistics/Publications/PublicationsPolicyAndGuidance/DH_4118614)]
  10. **Department of Health. National Service Framework for Older People. London; Department of Health, 2001.**  
[[www.dh.gov.uk/en/Publicationsandstatistics/Publications/PublicationsPolicyAndGuidance/DH\\_4003066](http://www.dh.gov.uk/en/Publicationsandstatistics/Publications/PublicationsPolicyAndGuidance/DH_4003066)]
  11. **Department of Health. National stroke strategy. London: Department of Health, 2007.**  
[[www.dh.gov.uk/en/Publicationsandstatistics/Publications/PublicationsPolicyAndGuidance/DH\\_081062](http://www.dh.gov.uk/en/Publicationsandstatistics/Publications/PublicationsPolicyAndGuidance/DH_081062)]
  12. **Department of Health. Putting prevention first. Vascular checks: risk assessment and management. London: Department of Health, 2008.**  
[[www.dh.gov.uk/en/Publicationsandstatistics/Publications/PublicationsPolicyAndGuidance/DH\\_083822](http://www.dh.gov.uk/en/Publicationsandstatistics/Publications/PublicationsPolicyAndGuidance/DH_083822)]
  13. **NHS Improvement — Heart.**  
[<http://www.improvement.nhs.uk/heart/>]
  14. Garcia Rodriguez LA, Gutthann SP: **Use of the UK General Practice Research Database for pharmacoepidemiology.** *Br J Clin Pharmacol* 1998;45:419-25.

- 1  
2  
3  
4  
5  
6  
7  
8  
9  
10  
11  
12  
13  
14  
15  
16  
17  
18  
19  
20  
21  
22  
23  
24  
25  
26  
27  
28  
29  
30  
31  
32  
33  
34  
35  
36  
37  
38  
39  
40  
41  
42  
43  
44  
45  
46  
47  
48  
49  
50  
51  
52  
53  
54  
55  
56  
57  
58  
59  
60
15. Jick SS, Kaye JA, Vasilakis-Scaramozza C, Garcia Rodriguez LA, Ruigomez A, Meier CR: **Validity of the general practice research database.** *Pharmacotherapy* 2003; **23**:686-9.
  16. Khan NF, Harrison SE, Rose PW. **Validity of diagnostic coding within the General Practice Research Database: a systematic review.** *Br J Gen Pract* 2010; **60**: e128-36.
  17. Herrett E, Thomas SL, Schoonen WM, Smeeth L, Hall AJ: **Validation and validity of diagnoses in the General Practice Research Database: a systematic review.** *Br J Clin Pharmacol* 2010; **69**:4-14.
  18. Heuschmann PU, Grieve AP, Toschke AM, Rudd AG, Wolfe CDA: **Ethnic group disparities in 10-year trends in stroke incidence and vascular risk factors. The South London Stroke Register (SLSR).** *Stroke* 2008; **39**:2204-2210.
  19. Feigin VL, Lawes CMM, Bennett DA, Barker-Collo SL, Parag V: **Worldwide stroke incidence and early case fatality reported in 56 population-based studies: a systematic review.** *Lancet Neurology* 2009; **8**:355-69.
  20. Toschke AM, Wolfe CD, Heuschmann PU, Rudd AG, Gulliford M: **Antihypertensive treatment after stroke and all-cause mortality — an analysis of the General Practitioner Research Database (GPRD).** *Cerebrovasc Dis* 2009;**28**:105-111.
  21. **Department of Health. Building on excellence, maintaining progress. Coronary Heart Disease National Service Framework progress report for 2008.**

- 1  
2  
3  
4  
5  
6  
7  
8  
9  
10  
11  
12  
13  
14  
15  
16  
17  
18  
19  
20  
21  
22  
23  
24  
25  
26  
27  
28  
29  
30  
31  
32  
33  
34  
35  
36  
37  
38  
39  
40  
41  
42  
43  
44  
45  
46  
47  
48  
49  
50  
51  
52  
53  
54  
55  
56  
57  
58  
59  
60
22. Falaschetti E, Chaudhury M, Mindell J, Poulter N: **Continued improvement in hypertension management in England: results from the Health Survey for England 2006.** *Hypertension* 2009; **53**:480-486.
23. **National Institute for Health and Clinical Excellence. Atrial fibrillation: the management of atrial fibrillation. Clinical Guideline 36.** Costing report; July 2006.
24. Gage BF, Waterman AD, Shannon W, Boechler M, Rich MW, Radford MJ: **Validation of clinical classification schemes for predicting stroke: results from the National Registry of Atrial Fibrillation.** *JAMA* 2001; **285**:2864 – 2870.
25. Gallagher AM, Rietbrock S, Plumb J, Van Staa TP: **Initiation and persistence of warfarin or aspirin in patients with chronic atrial fibrillation in general practice: do the appropriate patients receive stroke prophylaxis?** *J Thromb Haemost* 2008; **6**:1500-1506.
26. Mant J, Hobbs FDR, Fletcher K, Roalfe A, Fitzmaurice D, Lip GYH, Murray E: **Warfarin versus aspirin for stroke prevention in an elderly community population with atrial fibrillation (the Birmingham atrial fibrillation treatment of the aged study, BAFTA): a randomised controlled trial.** *Lancet* 2007; **370**:493-503.
27. Hippisley-Cox J, Pringle M, Crown N, Meal A, Wynn A: **Sex inequalities in ischaemic heart disease in general practice: cross sectional survey.** *BMJ* 2001; **322**:832-836.
28. Nicol ED, Fittall B, Roughton M, Cleland JGF, Dargie HJ, Cowie MR: **NHS heart failure survey: a survey of acute heart failure admissions in England, Wales and Northern Ireland.** *Heart* 2008; **94**:172-177.

## Figures

Figure 1 - Incidence (A) and prevalence (B) of stroke in the UK adult population by age group

Figure 2 - Stroke mortality within 56 days of first stroke by age group

Figure 3 - Pharmaceutical therapies prior to first stroke (A) and in the year following first stroke (B)

Figure 4 - Percentage of GP-coded AF patients treated with anticoagulant and antiplatelet therapy prior to stroke by CHADS<sub>2</sub> score

## Tables

TABLE 1. Baseline characteristics of GPRD stroke cohort

|                                                                              | Male<br>(n=14 359) | %    | 99% CI         | Female<br>(n=17 792) | %    | 99% CI         | Total<br>(n=32 151) | %    | 99% CI         |
|------------------------------------------------------------------------------|--------------------|------|----------------|----------------------|------|----------------|---------------------|------|----------------|
| <b>Demographic characteristics</b>                                           |                    |      |                |                      |      |                |                     |      |                |
| Mean (SD) age                                                                | 71.06 (12.7)       |      | (70.8 to 71.3) | 77.02 (13.0)         |      | (76.8 to 77.3) | 74.4 (13.2)         |      | (74.2 to 74.6) |
| Mean (SD) body mass index (n=23,856)                                         | 26.52 (4.6)        |      | (26.4 to 26.6) | 26.16 (5.6)          |      | (26.1 to 26.3) | 26.3 (5.13)         |      | (26.2 to 26.4) |
| <b>Risk factors prior to initial stroke</b>                                  |                    |      |                |                      |      |                |                     |      |                |
| Hypertension (GP diagnosed or >160/100mm Hg)                                 | 8851               | 61.6 | (60.6 to 62.7) | 12108                | 68.1 | (67.2 to 69.0) | 20959               | 65.2 | (64.5 to 65.9) |
| Hypercholesterolaemia (GP diagnosed or cholesterol > 5 mmol/L (193 mg/dL))   | 5730               | 39.9 | (38.9 to 41.0) | 6710                 | 37.7 | (36.8 to 38.7) | 12440               | 38.7 | (38.0 to 39.4) |
| GP-coded Diabetes mellitus                                                   | 1875               | 13.1 | (12.3 to 13.8) | 1909                 | 10.7 | (10.1 to 11.3) | 3784                | 11.8 | (11.3 to 12.2) |
| Smoking (ever)                                                               | 8015               | 55.8 | (54.7 to 56.9) | 6210                 | 34.9 | (34.0 to 35.8) | 14225               | 44.2 | (43.5 to 45.0) |
| GP-coded Atrial fibrillation                                                 | 1411               | 9.8  | (9.2 to 10.5)  | 2072                 | 11.6 | (11.0 to 12.3) | 3483                | 10.8 | (10.4 to 11.3) |
| GP-coded Transient ischaemic attack                                          | 897                | 6.2  | (5.7 to 6.8)   | 1111                 | 6.2  | (5.8 to 6.7)   | 2008                | 6.2  | (5.9 to 6.6)   |
| <b>Treatments in year prior to initial stroke (at least 2 prescriptions)</b> |                    |      |                |                      |      |                |                     |      |                |
| Antihypertensives                                                            | 6453               | 44.9 | (43.9 to 46.0) | 9649                 | 54.2 | (53.3 to 55.2) | 16102               | 50.1 | (49.4 to 50.8) |
| ACE inhibitors and angiotensin receptor antagonists                          | 3226               | 22.5 | (21.6 to 23.4) | 3845                 | 21.6 | (20.8 to 22.4) | 7071                | 22   | (21.4 to 22.6) |
| Beta-blockers                                                                | 2252               | 15.7 | (14.9 to 16.5) | 3581                 | 20.1 | (19.4 to 20.9) | 5833                | 18.1 | (17.6 to 18.7) |
| Calcium channel blockers                                                     | 2349               | 16.4 | (15.6 to 17.2) | 2988                 | 16.8 | (16.1 to 17.5) | 5337                | 16.6 | (16.1 to 17.1) |
| Diuretics                                                                    | 3362               | 23.4 | (22.5 to 24.3) | 6142                 | 34.5 | (33.6 to 35.4) | 9504                | 29.6 | (28.9 to 30.2) |
| Anticoagulants                                                               | 703                | 4.9  | (4.4 to 5.4)   | 787                  | 4.4  | (4.0 to 4.8)   | 1490                | 4.6  | (4.3 to 4.9)   |
| Antiplatelet drugs                                                           | 4029               | 28.1 | (27.1 to 29.0) | 5471                 | 30.7 | (29.9 to 31.6) | 9500                | 29.5 | (28.9 to 30.2) |
| Lipid regulating drugs                                                       | 2004               | 14   | (13.2 to 14.7) | 2221                 | 12.5 | (11.8 to 13.1) | 4225                | 13.1 | (12.7 to 13.6) |
| <b>Diabetes treatment</b>                                                    |                    |      |                |                      |      |                |                     |      |                |
| Oral antidiabetic agents                                                     | 1193               | 8.3  | (7.7 to 8.9)   | 1180                 | 6.6  | (6.2 to 7.1)   | 2373                | 7.4  | (7.0 to 7.8)   |
| Insulin                                                                      | 340                | 2.4  | (2.0 to 2.7)   | 417                  | 2.3  | (2.1 to 2.6)   | 757                 | 2.4  | (2.1 to 2.6)   |

TABLE 2. Patients with GP-coded atrial fibrillation prior to first stroke

| GP-coded atrial fibrillation                                                                                                | Male       | %      | 95% CI         | Female     | %      | 95% CI         | Total      | %      | 95% CI         |
|-----------------------------------------------------------------------------------------------------------------------------|------------|--------|----------------|------------|--------|----------------|------------|--------|----------------|
| Number of patients (% of cohort)                                                                                            | 1411       | 9.8    |                | 2072       | 11.6   |                | 3483       | 10.8   |                |
| <b>Baseline characteristics</b>                                                                                             |            |        |                |            |        |                |            |        |                |
| Mean (SD) age                                                                                                               | 77.3 (9.8) |        | (76.8 to 77.8) | 82.4 (8.7) |        | (82.0 to 82.8) | 80.3 (9.5) |        | (80.0,80.6)    |
| CHADS <sub>2</sub> Score prior to initial stroke (% of AF patients)                                                         |            |        |                |            |        |                |            |        |                |
| 0                                                                                                                           | 217        | 15.4   | (13.5 to 17.3) | 127        | 6.1    | (5.1 to 7.2)   | 344        | 9.9    | (8.9 to 10.9)  |
| 1                                                                                                                           | 601        | 42.6   | (40.0 to 45.2) | 730        | 35.2   | (33.2 to 37.3) | 1,331      | 38.2   | (36.6 to 39.8) |
| 2                                                                                                                           | 430        | 30.5   | (28.1 to 32.9) | 877        | 42.3   | (40.2 to 44.5) | 1,307      | 37.5   | (35.9 to 39.1) |
| 3                                                                                                                           | 108        | 7.7    | (6.3 to 9.0)   | 213        | 10.3   | (9.0 to 11.6)  | 321        | 9.2    | (8.3 to 10.2)  |
| 4                                                                                                                           | 49         | 3.5    | (2.5 to 4.4)   | 111        | 5.4    | (4.4 to 6.3)   | 160        | 4.6    | (3.9 to 5.3)   |
| 5                                                                                                                           | 6          | 0.4    | (0.1 to 0.8)   | 14         | 0.7    | (0.3 to 1.0)   | 20         | 0.6    | (0.3 to 0.8)   |
| <b>Treatments in year prior to initial stroke (at least 2 prescriptions) (% of AF patients)</b>                             |            |        |                |            |        |                |            |        |                |
| Anticoagulants                                                                                                              | 415        | 29.4   | (27.0 to 31.8) | 461        | 22.2   | (20.5 to 24.0) | 876        | 25.2   | (23.7 to 26.6) |
| Antiplatelet drugs                                                                                                          | 668        | 47.3   | (44.7 to 49.9) | 1128       | 54.4   | (52.3 to 56.6) | 1,796      | 51.6   | (49.9 to 53.2) |
| <b>Follow-up</b>                                                                                                            |            |        |                |            |        |                |            |        |                |
| Died within 56 days of initial stroke (% of AF patients)                                                                    | 264        | 18.7   | (16.7 to 20.7) | 554        | 26.7   | (24.8 to 28.6) | 818        | 23.5   | (22.1 to 24.9) |
| Survived at least 56 days following initial stroke (% of AF patients)                                                       | 1147       | 81.3   | (79.3 to 83.3) | 1518       | 73.3   | (71.4 to 75.2) | 2665       | 76.5   | (75.1 to 77.9) |
| <b>Treatments in year following initial stroke (at least 2 prescriptions) (% of patients who survived at least 56 days)</b> |            |        |                |            |        |                |            |        |                |
| Anticoagulants                                                                                                              | 545        | 47.50% | (44.9 to 50.1) | 529        | 34.80% | (32.8 to 36.9) | 1,074      | 40.30% | (38.7 to 41.9) |
| Antiplatelet drugs                                                                                                          | 566        | 49.30% | (46.7 to 52)   | 806        | 53.10% | (50.9 to 55.2) | 1,372      | 51.50% | (49.8 to 53.1) |

## Additional files

Web Only file: Appendix 1 – GPRD Codes

**STROBE checklist for EARTH study**Cohort Study  
Checklist

|                           | Item No | Recommendation                                                                                                                                                                       | Page Number | Section                               | Additional Information                                                                                                                                                                                          |
|---------------------------|---------|--------------------------------------------------------------------------------------------------------------------------------------------------------------------------------------|-------------|---------------------------------------|-----------------------------------------------------------------------------------------------------------------------------------------------------------------------------------------------------------------|
| <b>Title and abstract</b> |         |                                                                                                                                                                                      |             |                                       |                                                                                                                                                                                                                 |
|                           | 1       | (a) Indicate the study's design with a commonly used term in the title or the abstract                                                                                               | 2           | Abstract                              |                                                                                                                                                                                                                 |
|                           |         | (b) Provide in the abstract an informative and balanced summary of what was done and what was found                                                                                  | 2           | Abstract                              |                                                                                                                                                                                                                 |
| <b>Introduction</b>       |         |                                                                                                                                                                                      |             |                                       |                                                                                                                                                                                                                 |
| Background/rationale      | 2       | Explain the scientific background and rationale for the investigation being reported                                                                                                 | 3           | Introduction                          |                                                                                                                                                                                                                 |
| Objectives                | 3       | State specific objectives, including any prespecified hypotheses                                                                                                                     | 3           | Objectives                            |                                                                                                                                                                                                                 |
| <b>Methods</b>            |         |                                                                                                                                                                                      |             |                                       |                                                                                                                                                                                                                 |
| Study design              | 4       | Present key elements of study design early in the paper                                                                                                                              | 3           | Methods-<br>Study Design              |                                                                                                                                                                                                                 |
| Setting                   | 5       | Describe the setting, locations, and relevant dates, including periods of recruitment, exposure, follow-up, and data collection                                                      | 3           | Methods-<br>Data Source               |                                                                                                                                                                                                                 |
| Participants              | 6       | (a) Give the eligibility criteria, and the sources and methods of selection of participants. Describe methods of follow-up                                                           | 4           | Methods-<br>Population &<br>Follow Up |                                                                                                                                                                                                                 |
|                           |         | (b) For matched studies, give matching criteria and number of exposed and unexposed                                                                                                  | NA          |                                       |                                                                                                                                                                                                                 |
| Variables                 | 7       | Clearly define all outcomes, exposures, predictors, potential confounders, and effect modifiers. Give diagnostic criteria, if applicable                                             | 4           | Methods-<br>Population &<br>Analysis  |                                                                                                                                                                                                                 |
| Data sources/measurement  | 8*      | For each variable of interest, give sources of data and details of methods of assessment (measurement). Describe comparability of assessment methods if there is more than one group | 3           | Methods-<br>Data Source               |                                                                                                                                                                                                                 |
| Bias                      | 9       | Describe any efforts to address potential sources of bias                                                                                                                            | 9           | Limitations                           |                                                                                                                                                                                                                 |
| Study size                | 10      | Explain how the study size was arrived at                                                                                                                                            |             |                                       | This is a descriptive study, and no comparative analysis is being carried out, and therefore a sample size calculation is not appropriate. Our cohort of over 32,000 patients is very large, and allows precise |
|                           |         |                                                                                                                                                                                      | NA          |                                       |                                                                                                                                                                                                                 |



estimates of population variables, as shown in the paper by the narrow 99% confidence intervals.

|                        |    |                                                                                                                              |       |                   |
|------------------------|----|------------------------------------------------------------------------------------------------------------------------------|-------|-------------------|
| Quantitative variables | 11 | Explain how quantitative variables were handled in the analyses. If applicable, describe which groupings were chosen and why | 4     | Methods-Analysis  |
| Statistical methods    | 12 | (a) Describe all statistical methods, including those used to control for confounding                                        | 4     | Methods-Analysis  |
|                        |    | (b) Describe any methods used to examine subgroups and interactions                                                          | 4 & 5 | Methods-Follow Up |
|                        |    | (c) Explain how missing data were addressed                                                                                  | 4     | Methods-Analysis  |
|                        |    | (d) If applicable, explain how loss to follow-up was addressed                                                               |       |                   |
|                        |    | (e) Describe any sensitivity analyses                                                                                        | 4     | Methods-Analysis  |
|                        |    |                                                                                                                              | NA    |                   |

This is a GPRD study so the only type of missing data is values which are not recorded for every patients, such as body mass index. This is addressed in the Methods section. Further missing data is unlikely due to the nature of a GP database, All patients are followed up until death or until they transferred out of practice.

**Results**

|                  |     |                                                                                                                                                                                                    |   |                          |
|------------------|-----|----------------------------------------------------------------------------------------------------------------------------------------------------------------------------------------------------|---|--------------------------|
| Participants     | 13* | (a) Report numbers of individuals at each stage of study? eg numbers potentially eligible, examined for eligibility, confirmed eligible, included in the study, completing follow-up, and analysed | 5 | Baseline characteristics |
|                  |     | (b) Give reasons for non-participation at each stage                                                                                                                                               | 5 | Baseline characteristics |
|                  |     | (c) Consider use of a flow diagram                                                                                                                                                                 | - | -                        |
| Descriptive data | 14* | (a) Give characteristics of study participants (eg demographic, clinical, social) and information on exposures and potential confounders                                                           | 5 | Results- Table 1         |
|                  |     | (b) Indicate number of participants with missing data for each variable of interest                                                                                                                | 5 | Results- Table 1         |

1  
2  
3  
4  
5  
6  
7  
8  
9  
10  
11  
12  
13  
14  
15  
16  
17  
18  
19  
20  
21  
22  
23  
24  
25  
26  
27  
28  
29  
30  
31  
32  
33  
34  
35  
36  
37  
38  
39  
40  
41  
42  
43  
44  
45  
46  
47  
48  
49  
50  
51  
52  
53  
54  
55  
56  
57  
58  
59  
60

|                          |     |                                                                                                                                                                                                                                                                                                                                                                                                               |                          |                                                                              |
|--------------------------|-----|---------------------------------------------------------------------------------------------------------------------------------------------------------------------------------------------------------------------------------------------------------------------------------------------------------------------------------------------------------------------------------------------------------------|--------------------------|------------------------------------------------------------------------------|
|                          |     | (c) Summarise follow-up time (eg average and total amount)                                                                                                                                                                                                                                                                                                                                                    |                          | Results-<br>Baseline<br>characteristics                                      |
| Outcome data             | 15* | Report numbers of outcome events or summary measures over time                                                                                                                                                                                                                                                                                                                                                | 5                        | Results-<br>Stroke<br>mortality and<br>Recurrent<br>cardiovascular<br>events |
| Main results             | 16  | (a) Give unadjusted estimates and, if applicable, confounder-adjusted estimates and their precision (eg, 95% confidence interval). Make clear which confounders were adjusted for and why they were included<br>(b) Report category boundaries when continuous variables were categorized<br>(c) If relevant, consider translating estimates of relative risk into absolute risk for a meaningful time period | 6<br><br>5 & 6<br><br>NA | Results<br><br>NA                                                            |
| Other analyses           | 17  | Report other analyses done? eg analyses of subgroups and interactions, and sensitivity analyses                                                                                                                                                                                                                                                                                                               | NA<br><br>6 & 7          | NA<br><br>Results- Atrial<br>fibrillation                                    |
| <b>Discussion</b>        |     |                                                                                                                                                                                                                                                                                                                                                                                                               |                          |                                                                              |
| Key results              | 18  | Summarise key results with reference to study objectives                                                                                                                                                                                                                                                                                                                                                      | 7                        | Discussion                                                                   |
| Limitations              | 19  | Discuss limitations of the study, taking into account sources of potential bias or imprecision. Discuss both direction and magnitude of any potential bias                                                                                                                                                                                                                                                    | 8                        | Discussion-<br>limitations                                                   |
| Interpretation           | 20  | Give a cautious overall interpretation of results considering objectives, limitations, multiplicity of analyses, results from similar studies, and other relevant evidence                                                                                                                                                                                                                                    | 7 & 8 &<br>9             | Discussion &<br>Implications                                                 |
| Generalisability         | 21  | Discuss the generalisability (external validity) of the study results                                                                                                                                                                                                                                                                                                                                         | 7                        | Discussion                                                                   |
| <b>Other information</b> |     |                                                                                                                                                                                                                                                                                                                                                                                                               |                          |                                                                              |
| Funding                  | 22  | Give the source of funding and the role of the funders for the present study and, if applicable, for the original study on which the present article is based                                                                                                                                                                                                                                                 | 10                       | Funding                                                                      |

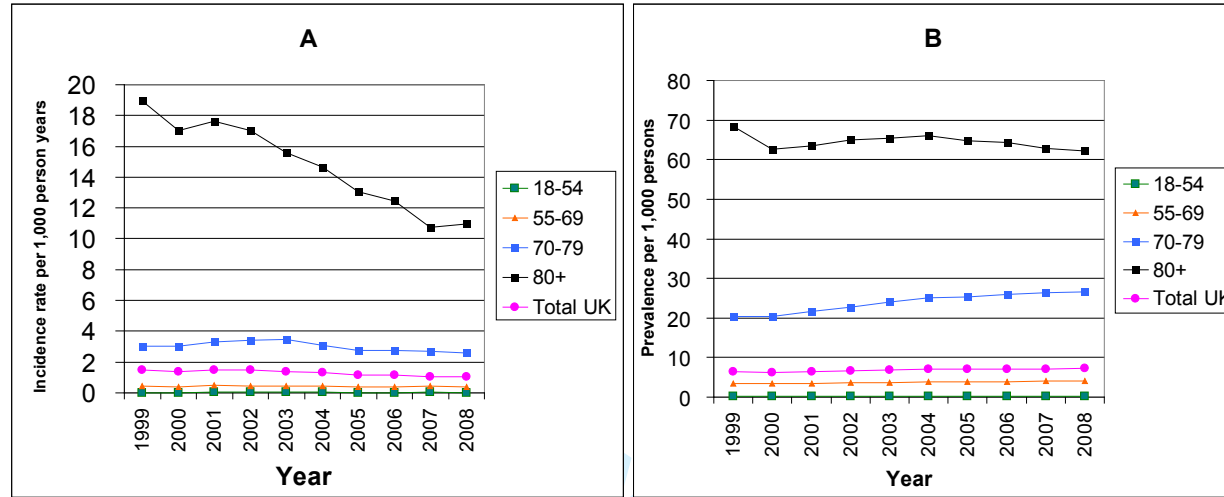

Fig 1

1  
2  
3  
4  
5  
6  
7  
8  
9  
10  
11  
12  
13  
14  
15  
16  
17  
18  
19  
20  
21  
22  
23  
24  
25  
26  
27  
28  
29  
30  
31  
32  
33  
34  
35  
36  
37  
38  
39  
40  
41  
42  
43  
44  
45  
46  
47

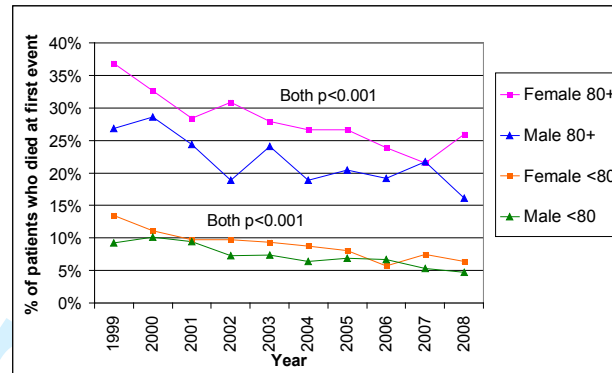

Fig 2

For peer review only

1  
2  
3  
4  
5  
6  
7  
8  
9  
10  
11  
12  
13  
14  
15  
16  
17  
18  
19  
20  
21  
22  
23  
24  
25  
26  
27  
28  
29  
30  
31  
32  
33  
34  
35  
36  
37  
38  
39  
40  
41  
42  
43  
44  
45  
46  
47

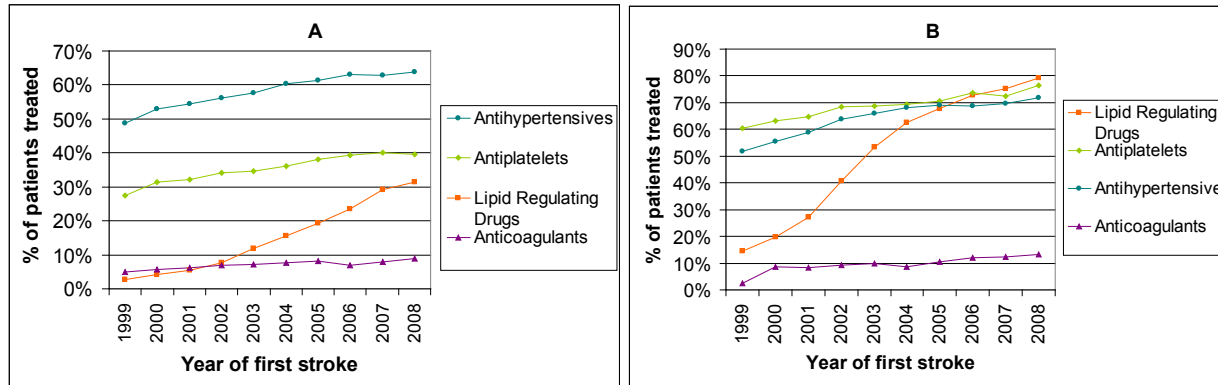

Fig 3

1  
2  
3  
4  
5  
6  
7  
8  
9  
10  
11  
12  
13  
14  
15  
16  
17  
18  
19  
20  
21  
22  
23  
24  
25  
26  
27  
28  
29  
30  
31  
32  
33  
34  
35  
36  
37  
38  
39  
40  
41  
42  
43  
44  
45  
46  
47

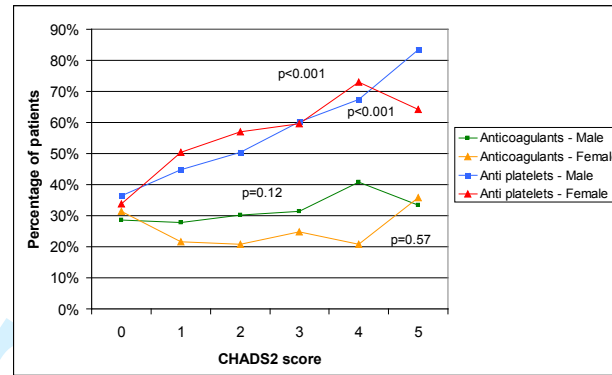

Fig 4

For peer review only

1  
2  
3  
4  
5  
6  
7  
8  
9  
10  
11  
12  
13  
14  
15  
16  
17  
18  
19  
20  
21  
22  
23  
24  
25  
26  
27  
28  
29  
30  
31  
32  
33  
34  
35  
36  
37  
38  
39  
40  
41  
42  
43  
44  
45  
46  
47



**UK stroke incidence, mortality and cardiovascular risk management 1999-2008: time-trend analysis from the General Practice Research Database**

|                                 |                                                                                                                                                                |
|---------------------------------|----------------------------------------------------------------------------------------------------------------------------------------------------------------|
| Journal:                        | <i>BMJ Open</i>                                                                                                                                                |
| Manuscript ID:                  | bmjopen-2011-000269.R1                                                                                                                                         |
| Article Type:                   | Research                                                                                                                                                       |
| Date Submitted by the Author:   | 09-Aug-2011                                                                                                                                                    |
| Complete List of Authors:       | Lee, Sally; Boehringer Ingelheim, MAPOR<br>Shafe, Anna; Boehringer Ingelheim, MAPOR<br>Cowie, Martin; Imperial College London, National Heart & Lung Institute |
| <b>Primary Subject Heading</b>: | Cardiovascular medicine                                                                                                                                        |
| Keywords:                       | CARDIOLOGY, STROKE MEDICINE, EPIDEMIOLOGY                                                                                                                      |
|                                 |                                                                                                                                                                |

SCHOLARONE™  
Manuscripts

only

1  
2  
3 **UK stroke incidence, mortality and cardiovascular risk**  
4  
5  
6 **management 1999-2008: time-trend analysis from the General**  
7  
8  
9 **Practice Research Database**  
10

11  
12  
13  
14 Sally Lee, PhD,<sup>1</sup> Anna Shafe, MSc,<sup>1</sup> Martin R Cowie, MD<sup>2§</sup>  
15  
16

17  
18  
19 <sup>1</sup> Boehringer Ingelheim Ltd, Ellesfield Avenue, Bracknell, Berkshire RG12 8YS, UK  
20

21 <sup>2</sup> National Heart & Lung Institute, Imperial College London, Dovehouse Street  
22

23  
24 London SW3 6LY, UK  
25  
26

27  
28 §Corresponding author  
29  
30

31  
32  
33 Email addresses and telephone numbers:  
34

35 SL: [sally.lee@boehringer-ingelheim.com](mailto:sally.lee@boehringer-ingelheim.com) +44 (1344) 74-6997  
36

37 AS: [anna.shafe@boehringer-ingelheim.com](mailto:anna.shafe@boehringer-ingelheim.com) +44 (1344) 74-1488  
38

39 MRC: [m.cowie@imperial.ac.uk](mailto:m.cowie@imperial.ac.uk) +44 (207) 351 8856  
40  
41  
42  
43  
44  
45

46 Keywords: Stroke, Cardiovascular diseases, General Practice, Atrial Fibrillation  
47

48 Word Count: 2,659 (excluding title page, abstract, references, figures and tables)  
49

50 The Corresponding Author has the right to grant on behalf of all authors and does  
51 grant on behalf of all authors, a worldwide licence to the Publishers and its licensees  
52 in perpetuity, in all forms, formats and media (whether known now or created in the  
53 future), to i) publish, reproduce, distribute, display and store the Contribution, ii)  
54 translate the Contribution into other languages, create adaptations, reprints, include  
55 within collections and create summaries, extracts and/or, abstracts of the  
56 Contribution, iii) create any other derivative work(s) based on the Contribution, iv) to  
57 exploit all subsidiary rights in the Contribution, v) the inclusion of electronic links  
58 from the Contribution to third party material where-ever it may be located; and, vi)  
59 licence any third party to do any or all of the above.  
60



## Abstract

### Objectives

Stroke is a major cause of morbidity and mortality. This study aimed to investigate secular trends in stroke across the UK.

### Design

This study aimed to investigate recent trends in the epidemiology of stroke in the UK. The study was a time-trend analysis from 1999 to 2008 within the UK General Practice Research Database. Outcome measures were incidence and prevalence of stroke, stroke mortality, rate of secondary cardiovascular events, and prescribing of pharmacological therapy for primary and secondary prevention of cardiovascular disease.

### Results

The study cohort included 32 151 patients with a first stroke. Stroke incidence fell by 30%, from 1.48/1000 person-years in 1999 to 1.04/1000 person-years in 2008 ( $P<0.001$ ). Stroke prevalence increased by 12.5%, from 6.40/1000 in 1999 to 7.20/1000 in 2008 ( $P<0.001$ ). Fifty-six-day mortality after first stroke reduced from 21% in 1999 to 12% in 2008 ( $P<0.0001$ ). Prescribing of drugs to control cardiovascular risk factors increased consistently over the study period, particularly for lipid lowering agents and antihypertensive agents. In patients with atrial fibrillation, use of anticoagulants prior to first stroke did not increase with increasing stroke risk.

## Conclusion

Stroke incidence in the UK has decreased and survival after stroke has improved in the past 10 years. Improved drug treatment in primary care is likely to be a major contributor to this, with better control of risk factors both before and after incident stroke. There is however scope for further improvement in risk factor reduction in high-risk patients with atrial fibrillation.

### ARTICLE FOCUS

Regional UK data have suggested a decline in stroke incidence, in association with increased use of preventive treatments and reduction in cardiovascular risk factors

This is the first national study to examine recent trends in stroke incidence and mortality

### KEY MESSAGES

In the UK, stroke incidence and stroke mortality fell consistently between 1999 and 2008

This change coincided with marked increase in primary care prescription of primary and secondary cardiovascular prevention therapies

Despite these positive findings, there appears to be a need for better risk stratification. The data suggest underutilisation of anticoagulation in patients with atrial fibrillation at high risk of stroke. There is also evidence of lower use of all preventive treatments in women than in men.

### STRENGTHS AND LIMITATIONS

The General Practice Research Database (GPRD) is the largest primary care database in the world, containing the longitudinal records of over 3 million patients.

We are reliant on the quality of GP coding in the GPRD dataset. There may be some coding error and misreporting of cardiovascular events and risk factors.

The GPRD contains secondary care data but this is limited to diagnoses; data on secondary care prescribing is not available.

## BACKGROUND

Stroke is a major cause of morbidity and mortality in the United Kingdom. Around 110 000 strokes occur in England each year,[1] with recent studies reporting an incidence of between 1.36/1000/year[2] and 1.62/1000/year in 2002-4.[3] A study in the Scottish Borders reported a higher crude incidence rate of 2.8/1000/year, which was attributed to the higher proportion of elderly in the population.[4] Although deaths from stroke have fallen in the UK over the past 40 years,[5-7] stroke accounted for around 46 500 deaths in England and Wales in 2008 (9% of all deaths).[8]

Current UK health policy places great emphasis on reducing stroke.[9-11] Key to this is the need for better management of vascular risk factors, including hypertension, obesity, high cholesterol, atrial fibrillation and diabetes.[6,11] In 2008, NHS Health Check (formerly called the Vascular Check Programme) was introduced to identify and manage vascular risk.[12] More recently, NHS Improvement has identified atrial fibrillation in primary care as a priority area for the health service for 2010/11.[13] From a public health perspective it is important to know whether national policies and preventive strategies are having an effect on stroke epidemiology. Perhaps the best data on trends in stroke comes from the Oxfordshire region where data from two studies — the Oxford Community Stroke Project (1981-4) and the Oxford Vascular Study (2002-4) — were compared.[3] The results suggested a decline in incidence of stroke ( $P=0.0002$ ), in association with increased use of preventive treatments and reduction in risk factors.

1  
2  
3  
4  
5  
6 There has been no study looking at trends in stroke across the UK. We report an analysis of  
7  
8 the General Practice Research Database (GPRD), used to investigate trends in the burden of  
9  
10 stroke between 1999 and 2008.

## 11 12 13 **DESIGN**

### 14 15 16 17 **Objectives**

18  
19 The objectives of this study were 1) to investigate recent trends in the epidemiology  
20  
21 of stroke in the UK, including risk factors associated with first and second strokes,  
22  
23 and pharmacological therapies prescribed before and following first stroke, and 2) to  
24  
25 examine the trend in stroke fatality and the occurrence of second stroke following  
26  
27 survival of a first stroke.  
28  
29  
30  
31  
32

### 33 34 **Data source**

35  
36 The GPRD is a database of longitudinal patient primary care records, containing  
37  
38 anonymised data on demographics, diagnoses, referrals, prescribing and health  
39  
40 outcomes for patients from almost 500 GP practices in the UK (over 3 million  
41  
42 patients). The database contains approximately 6% of UK patients, and the  
43  
44 geographical distribution is representative of the UK population.[16] Validation  
45  
46 studies have confirmed the high data quality and completeness of clinical records  
47  
48 within the GPRD.[15-17] A recent systematic literature review of studies using the  
49  
50 GPRD reported that the median proportion of diagnoses correctly coded was  
51  
52  
53 89%.[17]  
54  
55  
56  
57  
58

### 59 60 **Population**

1  
2  
3 We identified patients aged 18 years and older who had a first stroke between 1999  
4 and 2008. Stroke events were identified by a diagnosis for stroke within the patient  
5 record. The Read codes used by GPs to enter a stroke into a patient record do not  
6 necessarily specify the type of stroke, so we were not able to distinguish between  
7 ischaemic and haemorrhagic strokes. The codes used are shown in Additional  
8 Material 1. Stroke codes used were those which described acute stroke events only-  
9 any codes for monitoring or stroke rehabilitation were excluded to ensure that we  
10 correctly identified the initial stroke event and did not record follow up of the same  
11 stroke as a secondary stroke event.  
12  
13  
14  
15  
16  
17  
18  
19  
20  
21  
22  
23  
24  
25  
26

27 We excluded patients if they had any coded cardiovascular disease event (including  
28 coronary heart disease or peripheral vascular disease) recorded prior to stroke, except  
29 patients with a record of transient ischaemic attack (TIA).  
30  
31  
32  
33  
34  
35

### 36 Analysis

37 Data were extracted using GPRD GOLD online version and analysed using SAS®  
38 Software version 9.02. Incidence and prevalence of stroke were calculated based on  
39 our stroke cohort and the total study population extracted from GPRD.  
40  
41  
42  
43  
44  
45  
46  
47

48 Co-morbidities were identified using 'Read' codes (Additional Material 1). In  
49 addition to coded diagnosis, a blood pressure result above 160/100mm Hg was  
50 defined as hypertension and a cholesterol level above 5mmol/L (193mg/dL) was  
51 defined as hypercholesterolemia. Pharmacological therapies prescribed in the year  
52 before the first stroke were recorded. We assumed that patients were treated with a  
53  
54  
55  
56  
57  
58  
59  
60

1  
2  
3 medication if they received at least two prescriptions for that medication in the year  
4  
5 prior to first stroke.  
6  
7  
8  
9

10 For follow-up, patient data were available from the time of first stroke until the end of  
11  
12 the study period or when the patient transferred out of the practice or died. Stroke  
13  
14 events were considered fatal if patients had a death coded in their GP record within 56  
15  
16 days of the stroke. This timescale was used to allow for any delay between the death  
17  
18 occurring and the GP receiving notification of the death and entering it into their  
19  
20 coding system.  
21  
22  
23  
24  
25  
26

27 Second cardiovascular disease events were defined as a second stroke or other  
28  
29 cardiovascular disease event (coronary heart disease or peripheral vascular disease  
30  
31 event) occurring more than 56 days after a first stroke. A life table survival analysis  
32  
33 was carried out, with an event defined as either a second cardiovascular event or  
34  
35 death. Patients were censored if they transferred out of the practice or reached the end  
36  
37 of the study period.  
38  
39  
40  
41  
42

43 We examined trends in the proportion of patients treated with different classes of  
44  
45 pharmacological agents in the year before and after first stroke between 1999 and  
46  
47 2008. For patients with GP-coded atrial fibrillation (AF) prior to first stroke, we  
48  
49 calculated CHADS<sub>2</sub> scores<sup>9</sup> and recorded use of anticoagulants and antiplatelet drugs  
50  
51 for patients by CHADS<sub>2</sub> score in the year prior to and after first stroke.  
52  
53  
54  
55

## 56 **RESULTS**

57  
58  
59  
60

1  
2  
3  
4  
5  
6  
7  
8  
9  
10  
11  
12  
13  
14  
15  
16  
17  
18  
19  
20  
21  
22  
23  
24  
25  
26  
27  
28  
29  
30  
31  
32  
33  
34  
35  
36  
37  
38  
39  
40  
41  
42  
43  
44  
45  
46  
47  
48  
49  
50  
51  
52  
53  
54  
55  
56  
57  
58  
59  
60

Between 1999 and 2008 first strokes were recorded in 32 151 patients with no previous recorded cardiovascular event. Over this period, stroke incidence fell by 30%, from 1.48/1000 person-years in 1999 to 1.04/1000 person-years in 2008 ( $P<0.001$ ). In patients aged 80 years and over (the group at highest risk) incidence fell by 42% from 18.97 to 10.97/1000 person-years ( $P <0.001$ ). Prevalence of stroke increased by 12.5% over the same period from 6.4/1000 persons to 7.2/1000 persons ( $P<0.001$ ) (Figure 1).

Table 1 shows baseline characteristics of the cohort. The average age at first stroke was 77 years in women and 71 years in men. The most commonly coded stroke risk factor was hypertension, recorded in 65% of patients. Twelve per cent of patients were coded as diabetic, and 11% had coded AF.

Fifteen per cent (4926/32 151) of first strokes were fatal (death coded within 56 days). Mortality was 18.6% (3301 of 17 792) in women, and 11.3% (1625 of 14 359) in men. Age-adjusted to the 2008 UK population[10] the mortality difference was smaller but remained higher in women (6.8%) than men (5.5%) ( $P<0.001$  for difference between genders). Crude mortality after incident stroke decreased from 21% in 1999 to 12% in 2008 ( $P<0.0001$ ). This trend was seen in both men and women (Figure 2).

Five-year survival was 82% (11 774/14 359) in men and 81% (14 411/17 792) in women. Life table survival analysis showed that survival free of a second cardiovascular event (recurrent stroke or first CHD event) at five years was 74% (23 766/32 151) and similar in men and women. After first stroke, patients were at high

1  
2  
3 risk of a recurrent event. Of patients followed up for five years, 24% (3316 of 13599)  
4  
5 had a second cardiovascular event; 75% of second events (2475) were strokes and  
6  
7  
8 16% of these (385) were fatal within 56 days.  
9

### 10 11 12 **Stroke Risk Factors and Management** 13

14  
15 Sixty-five per cent of patients (n=20 959) had hypertension. Of these, 67% were  
16  
17 treated with antihypertensives in the year prior to stroke: 69% of female and 64% of  
18  
19 male patients.  
20  
21

22  
23  
24 Prescription of treatment for cardiovascular risk reduction in the year prior to a first  
25  
26 stroke increased over time (Figure 3A). A similar trend was seen in prescriptions after  
27  
28 the first stroke (Figure 3B). By 2008, 96.6% of women and 97.4% of men with coded  
29  
30 hypertension in the year after stroke were receiving antihypertensive therapy.  
31  
32

33  
34  
35 Before first stroke, 38.7% of patients (n=12 440) had hypercholesterolemia; 8.7%  
36  
37 were treated with lipid lowering drugs in 1999, rising to 37.6% in 2008. Prescriptions  
38  
39 for lipid lowering drugs after a first stroke also increased rapidly over the last 10 years  
40  
41  
42 (Figure 3).  
43  
44

45  
46  
47  
48 Eleven per cent of patients (n=3483) had coded AF before their first stroke: 10% of  
49  
50 male patients and 12% of female patients (Table 1). These patients were older than  
51  
52 the general stroke cohort. The average age in the AF group at the time of first stroke  
53  
54 was 82 years for women and 77 years for men. Stroke mortality was higher in patients  
55  
56 with coded AF than for the overall cohort: 27% of women and 19% of men with AF  
57  
58 died within 56 days of their first stroke. For those over the age of 70 years, 56-day  
59  
60



1  
2  
3 mortality after first stroke was 32% in men with coded AF compared with 23% in  
4  
5 men without coded AF ( $p<0.001$ ), and 36% in women with coded AF compared with  
6  
7 28% in women without coded AF ( $p<0.001$ ).  
8  
9

10  
11  
12 Women were at higher risk, with 59% having a CHADS<sub>2</sub> score of 2 or above prior to  
13  
14 first stroke compared with 42% of men. When we excluded age from the CHADS<sub>2</sub>  
15  
16 calculation, women still scored higher than men: 67% of women and 59% of men had  
17  
18 a score of 1 or above, and 18% of women and 16% of men had a score of 2 or above.  
19  
20  
21

22  
23  
24 Of patients with coded AF, 25% (876) were prescribed anticoagulants before their  
25  
26 stroke: 22% of women and 29% of men. Anticoagulant prescribing did not increase  
27  
28 with increasing CHADS<sub>2</sub> score prior to stroke (Figure 4). Antiplatelet therapy was  
29  
30 prescribed to 52% of patients with coded AF (1796/3483) (54% of women and 47%  
31  
32 of men) and prescribing increased steeply with increasing CHADS<sub>2</sub> score.  
33  
34  
35

36  
37  
38 For patients with coded AF at time of first stroke, anticoagulant prescribing increased  
39  
40 from 22% prior to stroke to 35% after stroke for women, and from 29% to 48% for  
41  
42 men (Table 2). In patients aged 80 and older, anticoagulant prescribing increased from  
43  
44 18% to 23% in women and from 24% to 34% in men.  
45  
46  
47  
48  
49

## 50 51 **CONCLUSION**

### 52 53 54 **Summary of main findings**

55  
56  
57 Our study shows that the incidence of stroke in the UK fell by 29% between 1999 and  
58  
59 2008. The 56-day mortality after a first stroke fell by 43% between 1999 and 2008.  
60

Primary care management of cardiovascular risk has improved, with the majority of

1  
2  
3 recorded hypertension being controlled prior to stroke, and a rapid increase in  
4  
5 prescriptions for lipid lowering drugs to patients with diagnosed  
6  
7 hypercholesterolemia. However there is a clear suggestion that risk stratification is not  
8  
9 yet optimal, particularly in relation to patients with AF.  
10  
11  
12  
13  
14  
15  
16

### 17 **Comparison with existing literature**

18  
19 A fall in stroke incidence similar to that shown in our study has previously been  
20  
21 reported in Oxfordshire[3] and South London.[18] Our findings are also in line with  
22  
23 data from some other high-income countries, with Feigin reporting a 42% decrease in  
24  
25 age-adjusted stroke incidence rates over four decades to 2008.[19]  
26  
27  
28  
29  
30  
31

32 The observed reduction in stroke incidence is likely to be related to better control of  
33  
34 vascular risk factors both prior to and following a stroke. By the end of the study  
35  
36 period, GPs were treating cardiovascular risk factors much more aggressively than in  
37  
38 1999. A previous study[3] reported a trend to reduced incidence of stroke in  
39  
40 association with increased use of preventive treatments and reduction in risk factors.  
41  
42 Our data show improvement compared with a previous analysis of GPRD data (1997-  
43  
44 2006) in which only 75% of patients with diagnosed hypertension were receiving  
45  
46 antihypertensive therapy 90 days after incident stroke.[20] In our study, 97% of  
47  
48 patients with hypertension after stroke were receiving antihypertensive therapy.  
49  
50  
51  
52  
53  
54

55 Improved primary care management of risk factors presumably reflects national  
56  
57 initiatives to reduce cardiovascular disease. These include the Quality and Outcomes  
58  
59 Framework whereby GPs in England are incentivised to improve intervention on  
60

1  
2  
3 cardiovascular risk factors. The increased level of prescribing seen in our study is in  
4  
5 line with national increase in use of statins[21] and improved treatment of  
6  
7 hypertension.[22]  
8  
9

10  
11  
12 AF is an important risk factor for stroke but recent reports have highlighted that it is  
13  
14 both under-recognised and under-treated.[21,23] Our study confirms that such  
15  
16 individuals have a higher mortality risk after first stroke than patients in sinus rhythm.  
17  
18  
19

20  
21  
22 The CHADS<sub>2</sub> scoring system[24] is commonly used to assess stroke risk in patients  
23  
24 with AF and help guide thromboprophylaxis. In our study, anticoagulant prescribing  
25  
26 before stroke in patients with AF increased only slightly between 1999 and 2008. Use  
27  
28 of anticoagulants appeared to be unrelated to the patient's CHADS<sub>2</sub> score, as has been  
29  
30 reported previously.[25] There was a relatively high, and possibly inappropriate, level  
31  
32 of anticoagulant prescribing in lower risk patients (those with a CHADS<sub>2</sub> score of 0)  
33  
34 and no increase in use of anticoagulants with increasing stroke risk. The finding of  
35  
36 high use of anticoagulants in AF patients at low risk of stroke has been reported  
37  
38 previously in primary care in the UK.[25]  
39  
40  
41  
42  
43  
44

45  
46 Contrary to data from a previous study using GPRD,[25] we found that antiplatelet  
47  
48 prescribing increased significantly with increasing CHADS<sub>2</sub> score, indicating that  
49  
50 GPs might be responding to increasing thromboembolic risk by prescribing an  
51  
52 antiplatelet agent rather than an anticoagulant. Use of anticoagulants was lower in  
53  
54 women than men despite women's higher CHADS<sub>2</sub> scores. Women were older than  
55  
56 men in the AF patient population and lower use of anticoagulants might reflect  
57  
58 prescriber concerns that anticoagulants are more dangerous in the elderly. However,  
59  
60

1  
2  
3 there has been shown to be no significant difference in bleeding risk between warfarin  
4  
5 and aspirin in patients aged over 75 years.[26] The lower use of anticoagulants in  
6  
7 women might also reflect findings from other areas of cardiovascular disease that  
8  
9 women are treated less aggressively with drug therapy than men.[27,28]  
10  
11

### 12 13 14 15 **Limitations of study**

16  
17 We are reliant on the quality of GP coding in the GPRD dataset. There may be some  
18  
19 coding error and misreporting of cardiovascular events and risk factors. The GPRD  
20  
21 has quality criteria for practices involved in the data collection and we used data only  
22  
23 from such “up-to-standard” practices. A recent systematic review of the validity of  
24  
25 diagnostic coding within GPRD reported high positive predictive values (>80%) for  
26  
27 events such as myocardial infarction or stroke, but a lower value for AF (64.4%).[16]  
28  
29  
30  
31

32  
33  
34 Despite an observed difference in risk factors between men and women in our cohort,  
35  
36 we are not able to evaluate gender difference in the risk of secondary stroke, due to  
37  
38 the potential confounding factor of age; female patients were older than male patients.  
39  
40  
41 As the objectives of this study were purely descriptive we did not make any  
42  
43 adjustment for confounding factors. Further studies are needed to examine gender  
44  
45 differences in stroke risk and prevention.  
46  
47  
48  
49  
50

### 51 **Implications for clinical practice**

52  
53 This is the first UK-wide study to investigate recent trends in stroke and it shows  
54  
55 encouraging reduction in incidence of first stroke and improving survival. This is  
56  
57 likely to be due (at least partially) to much better identification of vascular risk and  
58  
59 prescription of preventive therapies prior to, and after, stroke. Despite these positive  
60

1  
2  
3 findings there are some areas where management appears to remain suboptimal.  
4  
5 Women are less well treated than men, perhaps due to an age bias. Patients with AF,  
6  
7 who do particularly poorly after stroke, do not appear to be appropriately risk  
8  
9 stratified for anticoagulation therapy. Improved detection of AF and  
10  
11 thromboprophylaxis in such patients should be a priority for healthcare systems.  
12  
13  
14  
15  
16  
17  
18  
19  
20  
21  
22  
23  
24  
25  
26  
27  
28  
29  
30  
31  
32  
33  
34  
35  
36  
37  
38  
39  
40  
41  
42  
43  
44  
45  
46  
47  
48  
49  
50  
51  
52  
53  
54  
55  
56  
57  
58  
59  
60

For peer review only

## Contributors

AS and SL performed the data extraction and data analyses, and helped write the manuscript. MC advised regarding the study design and data analyses, and wrote the manuscript. He is the guarantor for the study.

## Funding

The study was funded by Boehringer Ingelheim Ltd.

## Ethical Approval

The protocol for the study has been approved by the Independent Scientific Advisory Committee at the Medicines and Healthcare products Regulatory Agency.

## Competing interests

MRC provides consultancy advice to a number of pharmaceutical companies, including Boehringer Ingelheim. He holds no stocks or shares in any such company.

SL and AS are employees of Boehringer Ingelheim Ltd. **Boehringer Ingelheim Ltd market a number of cardiovascular therapies.**

## Data Sharing Statement

No additional data available.

## References

- 1 National Audit Office. Progress in improving stroke care. 2004.  
[[www.nao.org.uk/publications/0910/stroke.aspx](http://www.nao.org.uk/publications/0910/stroke.aspx)] Date accessed August 2011.
- 2 Hippisley-Cox J, Pringle M, Ryan R. Stroke: prevalence, incidence and care in general practices 2002 to 2004. Final report to the National Stroke Audit Team. Royal College of Physicians, London; 2004.
- 3 Rothwell PM, Coull AJ, Giles MF, et al. Change in stroke incidence, mortality, case-fatality, severity, and risk factors in Oxfordshire, UK from 1981 to 2004 (Oxford Vascular Study). *Lancet* 2004; **363**:1925-33.
- 4 Syme PD, Byrne AW, Chen R, et al. Community-based stroke incidence in a Scottish population. The Scottish Borders Stroke Study. *Stroke* 2005; **36**:1837-43.
- 5 Lawlor DA, Davey Smith G, Leon DA, et al. Secular trends in mortality by stroke subtype in the 20th century: a retrospective analysis. *Lancet* 2002;**370**:1818-23.
- 6 National Audit Office. Reducing brain damage: Faster access to better stroke care. 2005.  
[[www.nao.org.uk/publications/0506/reducing\\_brain\\_damage.aspx](http://www.nao.org.uk/publications/0506/reducing_brain_damage.aspx)] Date accessed August 2011.
- 7 Ashton C, Bajekal M, Raine R. Quantifying the contribution of leading causes of death to mortality decline among older people in England, 1991–2005. *Health Stat Quart* Spring 2010; 45:100-27. [[www.statistics.gov.uk/hsq/hsqissue](http://www.statistics.gov.uk/hsq/hsqissue)] Date accessed July 2010.
- 8 Office for National Statistics. Mortality statistics: Deaths registered in 2008. [[http://www.statistics.gov.uk/downloads/theme\\_health/DR2008/DR\\_08.pdf](http://www.statistics.gov.uk/downloads/theme_health/DR2008/DR_08.pdf)] Date accessed July 2010.

1  
2  
3 9 Department of Health. Saving lives: Our healthier nation. London: Stationery  
4 Office, 1999.

5  
6  
7  
8 [www.dh.gov.uk/en/Publicationsandstatistics/Publications/PublicationsPolicyAndGui  
9 dance/DH\_4118614] Date accessed July 2010.

10  
11  
12 10 Department of Health. National Service Framework for Older People. London;  
13 Department of Health, 2001.

14  
15  
16  
17 [www.dh.gov.uk/en/Publicationsandstatistics/Publications/PublicationsPolicyAndGui  
18 dance/DH\_4003066] Date accessed July 2010.

19  
20  
21  
22 11 Department of Health. National stroke strategy. London: Department of Health,  
23 2007.

24  
25  
26  
27 [www.dh.gov.uk/en/Publicationsandstatistics/Publications/PublicationsPolicyAndGui  
28 dance/DH\_081062] Date accessed July 2010.

29  
30  
31  
32 12 Department of Health. Putting prevention first. Vascular checks: risk assessment  
33 and management. London: Department of Health, 2008.

34  
35  
36  
37 [www.dh.gov.uk/en/Publicationsandstatistics/Publications/PublicationsPolicyAndGui  
38 dance/DH\_083822] Date accessed July 2010.

39  
40  
41 13 NHS Improvement — Heart.

42  
43 [http://www.improvement.nhs.uk/heart/] Date accessed July 2010.

44  
45  
46 14 Garcia Rodriguez LA, Gutthann SP. Use of the UK General Practice Research  
47 Database for pharmacoepidemiology. *Br J Clin Pharmacol* 1998;**45**:419-25.

48  
49  
50  
51 15 Jick SS, Kaye JA, Vasilakis-Scaramozza C, et al. Validity of the general practice  
52 research database. *Pharmacotherapy* 2003; **23**:686-9.

53  
54  
55  
56 16 Khan NF, Harrison SE, Rose PW. Validity of diagnostic coding within the General  
57 Practice Research Database: a systematic review. *Br J Gen Pract* 2010; **60**: 128-36.



1  
2  
3 17 Herrett E, Thomas SL, Schoonen WM, et al. Validation and validity of diagnoses  
4 in the General Practice Research Database: a systematic review. *Br J Clin Pharmacol*  
5  
6 2010; **69**:4-14.  
7

8  
9  
10 18 Heuschmann PU, Grieve AP, Toschke AM, et al. Ethnic group disparities in 10-  
11 year trends in stroke incidence and vascular risk factors. The South London Stroke  
12 Register (SLSR). *Stroke* 2008; **39**:2204-2210.  
13  
14

15  
16  
17 19 Feigin VL, Lawes CMM, Bennett DA, et al. Worldwide stroke incidence and early  
18 case fatality reported in 56 population-based studies: a systematic review. *Lancet*  
19 *Neurology* 2009; **8**:355-69.  
20  
21

22  
23  
24 20 Toschke AM, Wolfe CD, Heuschmann PU, et al. Antihypertensive treatment after  
25 stroke and all-cause mortality — an analysis of the General Practitioner Research  
26 Database (GPRD). *Cerebrovasc Dis* 2009;**28**:105-111.  
27  
28

29  
30  
31 21 Department of Health. Building on excellence, maintaining progress. Coronary  
32 Heart Disease National Service Framework progress report for 2008.  
33

34  
35  
36 [http://www.cardiomyopathy.org/assets/files/Progress%20report%202008.pdf] Date  
37 accessed August 2011.  
38

39  
40  
41 22 Falaschetti E, Chaudhury M, Mindell J, et al. Continued improvement in  
42 hypertension management in England: results from the Health Survey for England  
43 2006. *Hypertension* 2009; **53**:480-486.  
44  
45

46  
47  
48 23 National Institute for Health and Clinical Excellence. Atrial fibrillation: the  
49 management of atrial fibrillation. Clinical Guideline 36. Costing report; July 2006.  
50  
51 [http://www.nice.org.uk/CG36] Date accessed July 2010.  
52

53  
54  
55 24 Gage BF, Waterman AD, Shannon W, et al. Validation of clinical classification  
56 schemes for predicting stroke: results from the National Registry of Atrial Fibrillation.  
57  
58  
59  
60 *JAMA* 2001; **285**:2864 –2870.

1  
2  
3 25 Gallagher AM, Rietbrock S, Plumb J, et al. Initiation and persistence of warfarin or  
4  
5 aspirin in patients with chronic atrial fibrillation in general practice: do the  
6  
7 appropriate patients receive stroke prophylaxis? *J Thromb Haemost* 2008; **6**:1500-  
8  
9 1506.  
10

11  
12 26 Mant J, Hobbs FDR, Fletcher K, et al. Warfarin versus aspirin for stroke  
13  
14 prevention in an elderly community population with atrial fibrillation (the  
15  
16 Birmingham atrial fibrillation treatment of the aged study, BAFTA): a randomised  
17  
18 controlled trial. *Lancet* 2007; **370**:493-503.  
19  
20

21  
22 27 Hippisley-Cox J, Pringle M, Crown N, et al. Sex inequalities in ischaemic heart  
23  
24 disease in general practice: cross sectional survey. *BMJ* 2001; **322**:832-836.  
25  
26

27 28 Nicol ED, Fittall B, Roughton M, et al. NHS heart failure survey: a survey of acute  
28  
29 heart failure admissions in England, Wales and Northern Ireland. *Heart* 2008; **94**:172-  
30  
31 177.  
32  
33

## Figures

Figure 1 - Incidence (A) and prevalence (B) of stroke in the UK adult population by age group

Figure 2 - Stroke mortality within 56 days of first stroke by age group

Figure 3 - Pharmaceutical therapies prior to first stroke (A) and in the year following first stroke (B)

Figure 4 - Percentage of GP-coded AF patients treated with anticoagulant and antiplatelet therapy prior to stroke by CHADS<sub>2</sub> score

## Tables

TABLE 1. Baseline characteristics of GPRD stroke cohort

|                                                                              | Male<br>(n=14 359) | %    | 99% CI         | Female<br>(n=17 792) | %    | 99% CI         | Total<br>(n=32 151) | %    | 99% CI         |
|------------------------------------------------------------------------------|--------------------|------|----------------|----------------------|------|----------------|---------------------|------|----------------|
| <b>Demographic characteristics</b>                                           |                    |      |                |                      |      |                |                     |      |                |
| Mean (SD) age                                                                | 71.06 (12.7)       |      | (70.8 to 71.3) | 77.02 (13.0)         |      | (76.8 to 77.3) | 74.4 (13.2)         |      | (74.2 to 74.6) |
| Mean (SD) body mass index (n=23,856)                                         | 26.52 (4.6)        |      | (26.4 to 26.6) | 26.16 (5.6)          |      | (26.1 to 26.3) | 26.3 (5.13)         |      | (26.2 to 26.4) |
| <b>Risk factors prior to initial stroke</b>                                  |                    |      |                |                      |      |                |                     |      |                |
| Hypertension (GP diagnosed or >160/100mm Hg)                                 | 8851               | 61.6 | (60.6 to 62.7) | 12108                | 68.1 | (67.2 to 69.0) | 20959               | 65.2 | (64.5 to 65.9) |
| Hypercholesterolaemia (GP diagnosed or cholesterol > 5 mmol/L (193 mg/dL))   | 5730               | 39.9 | (38.9 to 41.0) | 6710                 | 37.7 | (36.8 to 38.7) | 12440               | 38.7 | (38.0 to 39.4) |
| GP-coded Diabetes mellitus                                                   | 1875               | 13.1 | (12.3 to 13.8) | 1909                 | 10.7 | (10.1 to 11.3) | 3784                | 11.8 | (11.3 to 12.2) |
| Smoking (ever)                                                               | 8015               | 55.8 | (54.7 to 56.9) | 6210                 | 34.9 | (34.0 to 35.8) | 14225               | 44.2 | (43.5 to 45.0) |
| GP-coded Atrial fibrillation                                                 | 1411               | 9.8  | (9.2 to 10.5)  | 2072                 | 11.6 | (11.0 to 12.3) | 3483                | 10.8 | (10.4 to 11.3) |
| GP-coded Transient ischaemic attack                                          | 897                | 6.2  | (5.7 to 6.8)   | 1111                 | 6.2  | (5.8 to 6.7)   | 2008                | 6.2  | (5.9 to 6.6)   |
| <b>Treatments in year prior to initial stroke (at least 2 prescriptions)</b> |                    |      |                |                      |      |                |                     |      |                |
| Antihypertensives                                                            | 6453               | 44.9 | (43.9 to 46.0) | 9649                 | 54.2 | (53.3 to 55.2) | 16102               | 50.1 | (49.4 to 50.8) |
| ACE inhibitors and angiotensin receptor antagonists                          | 3226               | 22.5 | (21.6 to 23.4) | 3845                 | 21.6 | (20.8 to 22.4) | 7071                | 22   | (21.4 to 22.6) |
| Beta-blockers                                                                | 2252               | 15.7 | (14.9 to 16.5) | 3581                 | 20.1 | (19.4 to 20.9) | 5833                | 18.1 | (17.6 to 18.7) |
| Calcium channel blockers                                                     | 2349               | 16.4 | (15.6 to 17.2) | 2988                 | 16.8 | (16.1 to 17.5) | 5337                | 16.6 | (16.1 to 17.1) |
| Diuretics                                                                    | 3362               | 23.4 | (22.5 to 24.3) | 6142                 | 34.5 | (33.6 to 35.4) | 9504                | 29.6 | (28.9 to 30.2) |
| Anticoagulants                                                               | 703                | 4.9  | (4.4 to 5.4)   | 787                  | 4.4  | (4.0 to 4.8)   | 1490                | 4.6  | (4.3 to 4.9)   |
| Antiplatelet drugs                                                           | 4029               | 28.1 | (27.1 to 29.0) | 5471                 | 30.7 | (29.9 to 31.6) | 9500                | 29.5 | (28.9 to 30.2) |
| Lipid regulating drugs                                                       | 2004               | 14   | (13.2 to 14.7) | 2221                 | 12.5 | (11.8 to 13.1) | 4225                | 13.1 | (12.7 to 13.6) |
| <b>Diabetes treatment</b>                                                    |                    |      |                |                      |      |                |                     |      |                |
| Oral antidiabetic agents                                                     | 1193               | 8.3  | (7.7 to 8.9)   | 1180                 | 6.6  | (6.2 to 7.1)   | 2373                | 7.4  | (7.0 to 7.8)   |
| Insulin                                                                      | 340                | 2.4  | (2.0 to 2.7)   | 417                  | 2.3  | (2.1 to 2.6)   | 757                 | 2.4  | (2.1 to 2.6)   |

TABLE 2. Patients with GP-coded atrial fibrillation prior to first stroke

| GP-coded atrial fibrillation                                                                                                | Male       | %      | 95% CI         | Female     | %      | 95% CI         | Total      | %      | 95% CI         |
|-----------------------------------------------------------------------------------------------------------------------------|------------|--------|----------------|------------|--------|----------------|------------|--------|----------------|
| Number of patients (% of cohort)                                                                                            | 1411       | 9.8    |                | 2072       | 11.6   |                | 3483       | 10.8   |                |
| <b>Baseline characteristics</b>                                                                                             |            |        |                |            |        |                |            |        |                |
| Mean (SD) age                                                                                                               | 77.3 (9.8) |        | (76.8 to 77.8) | 82.4 (8.7) |        | (82.0 to 82.8) | 80.3 (9.5) |        | (80.0,80.6)    |
| CHADS <sub>2</sub> Score prior to initial stroke (% of AF patients)                                                         |            |        |                |            |        |                |            |        |                |
| 0                                                                                                                           | 217        | 15.4   | (13.5 to 17.3) | 127        | 6.1    | (5.1 to 7.2)   | 344        | 9.9    | (8.9 to 10.9)  |
| 1                                                                                                                           | 601        | 42.6   | (40.0 to 45.2) | 730        | 35.2   | (33.2 to 37.3) | 1,331      | 38.2   | (36.6 to 39.8) |
| 2                                                                                                                           | 430        | 30.5   | (28.1 to 32.9) | 877        | 42.3   | (40.2 to 44.5) | 1,307      | 37.5   | (35.9 to 39.1) |
| 3                                                                                                                           | 108        | 7.7    | (6.3 to 9.0)   | 213        | 10.3   | (9.0 to 11.6)  | 321        | 9.2    | (8.3 to 10.2)  |
| 4                                                                                                                           | 49         | 3.5    | (2.5 to 4.4)   | 111        | 5.4    | (4.4 to 6.3)   | 160        | 4.6    | (3.9 to 5.3)   |
| 5                                                                                                                           | 6          | 0.4    | (0.1 to 0.8)   | 14         | 0.7    | (0.3 to 1.0)   | 20         | 0.6    | (0.3 to 0.8)   |
| <b>Treatments in year prior to initial stroke (at least 2 prescriptions) (% of AF patients)</b>                             |            |        |                |            |        |                |            |        |                |
| Anticoagulants                                                                                                              | 415        | 29.4   | (27.0 to 31.8) | 461        | 22.2   | (20.5 to 24.0) | 876        | 25.2   | (23.7 to 26.6) |
| Antiplatelet drugs                                                                                                          | 668        | 47.3   | (44.7 to 49.9) | 1128       | 54.4   | (52.3 to 56.6) | 1,796      | 51.6   | (49.9 to 53.2) |
| <b>Follow-up</b>                                                                                                            |            |        |                |            |        |                |            |        |                |
| Died within 56 days of initial stroke (% of AF patients)                                                                    | 264        | 18.7   | (16.7 to 20.7) | 554        | 26.7   | (24.8 to 28.6) | 818        | 23.5   | (22.1 to 24.9) |
| Survived at least 56 days following initial stroke (% of AF patients)                                                       | 1147       | 81.3   | (79.3 to 83.3) | 1518       | 73.3   | (71.4 to 75.2) | 2665       | 76.5   | (75.1 to 77.9) |
| <b>Treatments in year following initial stroke (at least 2 prescriptions) (% of patients who survived at least 56 days)</b> |            |        |                |            |        |                |            |        |                |
| Anticoagulants                                                                                                              | 545        | 47.50% | (44.9 to 50.1) | 529        | 34.80% | (32.8 to 36.9) | 1,074      | 40.30% | (38.7 to 41.9) |
| Antiplatelet drugs                                                                                                          | 566        | 49.30% | (46.7 to 52)   | 806        | 53.10% | (50.9 to 55.2) | 1,372      | 51.50% | (49.8 to 53.1) |

## Additional files

Web Only file: Appendix 1 – GPRD Codes

**STROBE checklist for EARTH study**Cohort Study  
Checklist

|                           | Item No | Recommendation                                                                                                                                                                       | Page Number | Section                               | Additional Information                                                                                                                                                                                          |
|---------------------------|---------|--------------------------------------------------------------------------------------------------------------------------------------------------------------------------------------|-------------|---------------------------------------|-----------------------------------------------------------------------------------------------------------------------------------------------------------------------------------------------------------------|
| <b>Title and abstract</b> |         |                                                                                                                                                                                      |             |                                       |                                                                                                                                                                                                                 |
|                           | 1       | (a) Indicate the study's design with a commonly used term in the title or the abstract                                                                                               | 2           | Abstract                              |                                                                                                                                                                                                                 |
|                           |         | (b) Provide in the abstract an informative and balanced summary of what was done and what was found                                                                                  | 2           | Abstract                              |                                                                                                                                                                                                                 |
| <b>Introduction</b>       |         |                                                                                                                                                                                      |             |                                       |                                                                                                                                                                                                                 |
| Background/rationale      | 2       | Explain the scientific background and rationale for the investigation being reported                                                                                                 | 3           | Introduction                          |                                                                                                                                                                                                                 |
| Objectives                | 3       | State specific objectives, including any prespecified hypotheses                                                                                                                     | 3           | Objectives                            |                                                                                                                                                                                                                 |
| <b>Methods</b>            |         |                                                                                                                                                                                      |             |                                       |                                                                                                                                                                                                                 |
| Study design              | 4       | Present key elements of study design early in the paper                                                                                                                              | 3           | Methods-<br>Study Design              |                                                                                                                                                                                                                 |
| Setting                   | 5       | Describe the setting, locations, and relevant dates, including periods of recruitment, exposure, follow-up, and data collection                                                      | 3           | Methods-<br>Data Source               |                                                                                                                                                                                                                 |
| Participants              | 6       | (a) Give the eligibility criteria, and the sources and methods of selection of participants. Describe methods of follow-up                                                           | 4           | Methods-<br>Population &<br>Follow Up |                                                                                                                                                                                                                 |
|                           |         | (b) For matched studies, give matching criteria and number of exposed and unexposed                                                                                                  | NA          |                                       |                                                                                                                                                                                                                 |
| Variables                 | 7       | Clearly define all outcomes, exposures, predictors, potential confounders, and effect modifiers. Give diagnostic criteria, if applicable                                             | 4           | Methods-<br>Population &<br>Analysis  |                                                                                                                                                                                                                 |
| Data sources/measurement  | 8*      | For each variable of interest, give sources of data and details of methods of assessment (measurement). Describe comparability of assessment methods if there is more than one group | 3           | Methods-<br>Data Source               |                                                                                                                                                                                                                 |
| Bias                      | 9       | Describe any efforts to address potential sources of bias                                                                                                                            | 9           | Limitations                           |                                                                                                                                                                                                                 |
| Study size                | 10      | Explain how the study size was arrived at                                                                                                                                            |             |                                       | This is a descriptive study, and no comparative analysis is being carried out, and therefore a sample size calculation is not appropriate. Our cohort of over 32,000 patients is very large, and allows precise |
|                           |         |                                                                                                                                                                                      | NA          |                                       |                                                                                                                                                                                                                 |

estimates of population variables, as shown in the paper by the narrow 99% confidence intervals.

|                        |    |                                                                                                                              |       |                   |
|------------------------|----|------------------------------------------------------------------------------------------------------------------------------|-------|-------------------|
| Quantitative variables | 11 | Explain how quantitative variables were handled in the analyses. If applicable, describe which groupings were chosen and why | 4     | Methods-Analysis  |
| Statistical methods    | 12 | (a) Describe all statistical methods, including those used to control for confounding                                        | 4     | Methods-Analysis  |
|                        |    | (b) Describe any methods used to examine subgroups and interactions                                                          | 4 & 5 | Methods-Follow Up |
|                        |    | (c) Explain how missing data were addressed                                                                                  | 4     | Methods-Analysis  |
|                        |    | (d) If applicable, explain how loss to follow-up was addressed                                                               |       |                   |
|                        |    | (e) Describe any sensitivity analyses                                                                                        | 4     | Methods-Analysis  |
|                        |    |                                                                                                                              | NA    |                   |

This is a GPRD study so the only type of missing data is values which are not recorded for every patients, such as body mass index. This is addressed in the Methods section. Further missing data is unlikely due to the nature of a GP database, All patients are followed up until death or until they transferred out of practice.

**Results**

|                  |     |                                                                                                                                                                                                    |   |                          |
|------------------|-----|----------------------------------------------------------------------------------------------------------------------------------------------------------------------------------------------------|---|--------------------------|
| Participants     | 13* | (a) Report numbers of individuals at each stage of study? eg numbers potentially eligible, examined for eligibility, confirmed eligible, included in the study, completing follow-up, and analysed | 5 | Baseline characteristics |
|                  |     | (b) Give reasons for non-participation at each stage                                                                                                                                               | 5 | Baseline characteristics |
|                  |     | (c) Consider use of a flow diagram                                                                                                                                                                 | - | -                        |
| Descriptive data | 14* | (a) Give characteristics of study participants (eg demographic, clinical, social) and information on exposures and potential confounders                                                           | 5 | Results- Table 1         |
|                  |     | (b) Indicate number of participants with missing data for each variable of interest                                                                                                                | 5 | Results- Table 1         |

1  
2  
3  
4  
5  
6  
7  
8  
9  
10  
11  
12  
13  
14  
15  
16  
17  
18  
19  
20  
21  
22  
23  
24  
25  
26  
27  
28  
29  
30  
31  
32  
33  
34  
35  
36  
37  
38  
39  
40  
41  
42  
43  
44  
45  
46  
47  
48  
49  
50  
51  
52  
53  
54  
55  
56  
57  
58  
59  
60

|                          |     |                                                                                                                                                                                                                                                                                                                                                                                                               |                          |                                                                              |
|--------------------------|-----|---------------------------------------------------------------------------------------------------------------------------------------------------------------------------------------------------------------------------------------------------------------------------------------------------------------------------------------------------------------------------------------------------------------|--------------------------|------------------------------------------------------------------------------|
|                          |     | (c) Summarise follow-up time (eg average and total amount)                                                                                                                                                                                                                                                                                                                                                    |                          | Results-<br>Baseline<br>characteristics                                      |
| Outcome data             | 15* | Report numbers of outcome events or summary measures over time                                                                                                                                                                                                                                                                                                                                                | 5                        | Results-<br>Stroke<br>mortality and<br>Recurrent<br>cardiovascular<br>events |
| Main results             | 16  | (a) Give unadjusted estimates and, if applicable, confounder-adjusted estimates and their precision (eg, 95% confidence interval). Make clear which confounders were adjusted for and why they were included<br>(b) Report category boundaries when continuous variables were categorized<br>(c) If relevant, consider translating estimates of relative risk into absolute risk for a meaningful time period | 6<br><br>5 & 6<br><br>NA | Results<br><br>NA                                                            |
| Other analyses           | 17  | Report other analyses done? eg analyses of subgroups and interactions, and sensitivity analyses                                                                                                                                                                                                                                                                                                               | NA<br><br>6 & 7          | NA<br><br>Results- Atrial<br>fibrillation                                    |
| <b>Discussion</b>        |     |                                                                                                                                                                                                                                                                                                                                                                                                               |                          |                                                                              |
| Key results              | 18  | Summarise key results with reference to study objectives                                                                                                                                                                                                                                                                                                                                                      | 7                        | Discussion                                                                   |
| Limitations              | 19  | Discuss limitations of the study, taking into account sources of potential bias or imprecision. Discuss both direction and magnitude of any potential bias                                                                                                                                                                                                                                                    | 8                        | Discussion-<br>limitations                                                   |
| Interpretation           | 20  | Give a cautious overall interpretation of results considering objectives, limitations, multiplicity of analyses, results from similar studies, and other relevant evidence                                                                                                                                                                                                                                    | 7 & 8 &<br>9             | Discussion &<br>Implications                                                 |
| Generalisability         | 21  | Discuss the generalisability (external validity) of the study results                                                                                                                                                                                                                                                                                                                                         | 7                        | Discussion                                                                   |
| <b>Other information</b> |     |                                                                                                                                                                                                                                                                                                                                                                                                               |                          |                                                                              |
| Funding                  | 22  | Give the source of funding and the role of the funders for the present study and, if applicable, for the original study on which the present article is based                                                                                                                                                                                                                                                 | 10                       | Funding                                                                      |



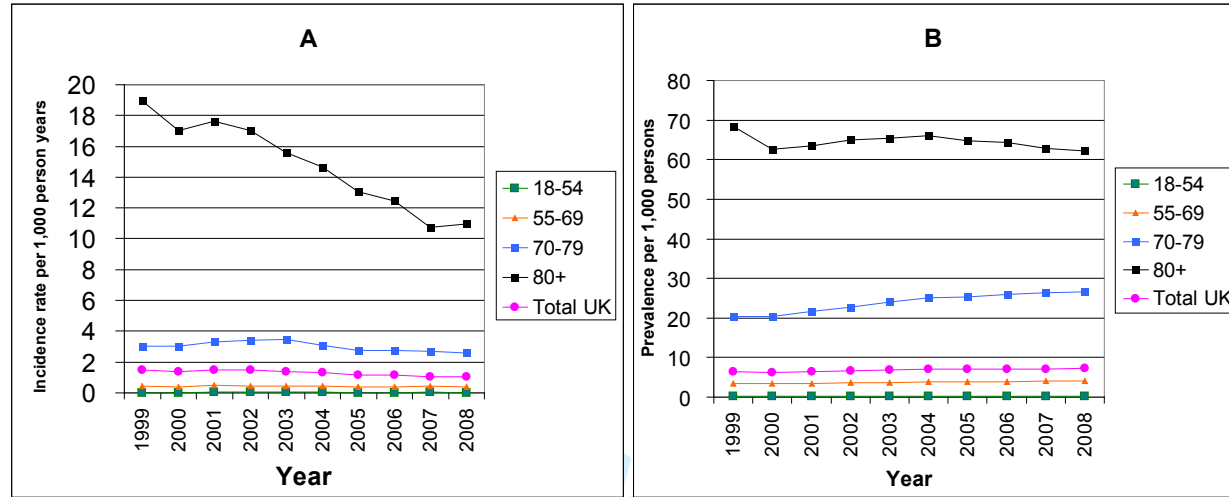

Fig 1

1  
2  
3  
4  
5  
6  
7  
8  
9  
10  
11  
12  
13  
14  
15  
16  
17  
18  
19  
20  
21  
22  
23  
24  
25  
26  
27  
28  
29  
30  
31  
32  
33  
34  
35  
36  
37  
38  
39  
40  
41  
42  
43  
44  
45  
46  
47



Fig 2



Fig 3

1  
2  
3  
4  
5  
6  
7  
8  
9  
10  
11  
12  
13  
14  
15  
16  
17  
18  
19  
20  
21  
22  
23  
24  
25  
26  
27  
28  
29  
30  
31  
32  
33  
34  
35  
36  
37  
38  
39  
40  
41  
42  
43  
44  
45  
46  
47



Fig 4

For peer review only

1  
2  
3  
4  
5  
6  
7  
8  
9  
10  
11  
12  
13  
14  
15  
16  
17  
18  
19  
20  
21  
22  
23  
24  
25  
26  
27  
28  
29  
30  
31  
32  
33  
34  
35  
36  
37  
38  
39  
40  
41  
42  
43  
44  
45  
46  
47
